1 **Genome-wide alterations of uracil distribution patterns in human DNA upon**  
2 **chemotherapeutic treatments**

3  
4 Hajnalka L. Pálincás<sup>1,2,3,\*</sup>, Angéla Békési<sup>1,2</sup>, Gergely Róna<sup>2,4,5</sup>, Lőrinc Pongor<sup>6,7</sup>, Gergely Tihanyi<sup>1,2</sup>, Eszter  
5 Holub<sup>2</sup>, Ádám Póti<sup>8</sup>, Carolina Gemma<sup>9</sup>, Simak Ali<sup>9</sup>, Michael J. Morten<sup>4</sup>, Eli Rothenberg<sup>4</sup>, Michele  
6 Pagano<sup>4,5,10</sup>, Dávid Szüts<sup>8</sup>, Balázs Gyórfy<sup>6,7</sup>, and Beáta G. Vértessy<sup>1,2,\*</sup>

7  
8 <sup>1</sup> Genome Metabolism Research Group, Institute of Enzymology, Research Centre for Natural Sciences,  
9 H-1117 Budapest, Hungary

10 <sup>2</sup> Department of Applied Biotechnology and Food Sciences, Budapest University of Technology and  
11 Economics, H-1111 Budapest, Hungary

12 <sup>3</sup> Doctoral School of Multidisciplinary Medical Science, University of Szeged, H-6720 Szeged, Hungary

13 <sup>4</sup> Department of Biochemistry and Molecular Pharmacology, New York University School of Medicine,  
14 New York, NY10016, United States

15 <sup>5</sup> Perlmutter Cancer Center, New York University School of Medicine, New York, NY10016, United States

16 <sup>6</sup> Cancer Biomarker Research Group, Institute of Enzymology, Research Centre for Natural Sciences, H-  
17 1117 Budapest, Hungary

18 <sup>7</sup> Semmelweis University, 2nd Department of Pediatrics, H-1094, Budapest, Hungary

19 <sup>8</sup> Genome Stability Research Group, Institute of Enzymology, Research Centre for Natural Sciences, H-  
20 1117 Budapest, Hungary

21 <sup>9</sup> Department of Surgery & Cancer, Imperial College London, Hammersmith Hospital Campus, London  
22 W12 0NN, UK

23 <sup>10</sup> Howard Hughes Medical Institute, New York University School of Medicine, New York, NY 10016,  
24 United States

25

26

27 **\*Corresponding authors:**

28 Hajnalka L. Pálincás (palinkas.hajnalka@ttk.hu)

29 and Beáta G. Vértessy (vertessy.beata@ttk.hu)

30

31 **Keywords:** uracil-DNA, genome-wide mapping, U-DNA-Seq, super-resolution microscopy, anti-cancer  
32 drug treatment

33

34 **ABSTRACT**

35 Numerous anti-cancer drugs perturb thymidylate biosynthesis and lead to genomic uracil incorporation  
36 contributing to their antiproliferative effect. Still, it is not yet characterized if uracil incorporations have any  
37 positional preference. Here, we aimed to uncover genome-wide alterations in uracil pattern upon drug-  
38 treatment in human cancer cell-line HCT116. We developed a straightforward U-DNA sequencing method  
39 (U-DNA-Seq) that was combined with *in situ* super-resolution imaging. Using a novel robust analysis  
40 pipeline, we found broad regions with elevated probability of uracil occurrence both in treated and non-  
41 treated cells. Correlation with chromatin markers and other genomic features shows that non-treated cells  
42 possess uracil in the late replicating constitutive heterochromatic regions, while drug treatment induced a  
43 shift of incorporated uracil towards more active/functional segments. Data were corroborated by  
44 colocalization studies via dSTORM microscopy. This approach can also be applied to study the dynamic  
45 *spatio-temporal* nature of genomic uracil.

## 46 INTRODUCTION

47 The thymine analogue uracil is one of the most frequent non-canonical bases in DNA appearing either by  
48 thymine replacing misincorporation or as a product of spontaneous or enzymatic cytosine deamination  
49 reaction (Krokan, Drabløs, & Slupphaug, 2002). Consequently, uracil in DNA is usually recognized as an  
50 error that is efficiently repaired by the multistep base excision repair (BER) pathway initiated by uracil-DNA  
51 glycosylases (UDGs) (Krokan & Bjørås, 2013; Wallace, 2014). In other respects, uracil in DNA is known to  
52 be involved in several physiological processes (e.g. antibody maturation (Liu & Schatz, 2009; Maul &  
53 Gearhart, 2010, 2014; Xu, Zan, Pone, Mai, & Casali, 2012), antiviral response (Burns, Leonard, & Harris,  
54 2015; Stenglein, Burns, Li, Lengyel, & Harris, 2010), insect development (Horváth, Békési, Muha, Erdélyi,  
55 & Vértessy, 2013; Muha et al., 2012)), however, the exact mechanism and regulation of uracil-DNA  
56 metabolism including the roles of UDGs need to be elucidated. There are four known members of the UDG  
57 family in humans: (i) the most active uracil-DNA glycosylase encoded by the *ung* gene (UNG1 mitochondrial  
58 and UNG2 nuclear isoform), (ii) the single-strand selective monofunctional uracil-DNA glycosylase 1  
59 (SMUG1), (iii) thymine DNA glycosylase (TDG specialized for repair of T:G and U:G) and (iv) methyl CpG  
60 binding domain protein (MBD4 repairs U:G) (Visnes et al., 2009). UNG2 removes most of the genomic  
61 uracil from both single- and double-stranded DNA regardless of the uracil originating from mutagenic  
62 cytosine deamination or thymine replacing misincorporation (Kavli et al., 2002).

63 Thymine replacing uracil misincorporation is normally prevented by the tight regulation of the cellular  
64 dUTP/dTTP ratio maintained by two enzymes, the dUTPase and the thymidylate synthase. The dUTPase  
65 enzyme (Vértessy & Tóth, 2009) removes dUTP from the cellular pool. Lack or inhibition of dUTPase leads  
66 to increased dUTP levels and under such conditions, DNA polymerases readily incorporate uracil opposite  
67 to adenine. Similarly, several anticancer drugs (such as 5-fluorouracil (5-FU), 5-fluoro-2'-deoxyuridine  
68 (5FdUR), capecitabine, methotrexate, raltitrexed (RTX), pemetrexed) target the *de novo* thymidylate  
69 synthesis pathway via thymidylate synthase inhibition to perturb the tightly regulated dUTP/dTTP ratio,  
70 eventually triggering thymineless cell death (Blackledge, 1998; Wilson, Danenberg, Johnston, Lenz, &  
71 Ladner, 2014). Although the exact molecular mechanism is not yet fully understood, massive uracil  
72 misincorporation, hyperactivity of the repair process and/or stalling of the replication fork are all suggested  
73 to be involved in the process (Khodursky, Guzmán, & Hanawalt, 2015; Ostrer, Hamann, & Khodursky,  
74 2015). UNG has been suggested to play a key role in this mechanism, as being responsible for the initiating  
75 step in uracil removal that may lead to futile cycles if the cellular dUTP/dTTP ratio is elevated. A quantitative  
76 insight into the magnitude and the pattern of uracil incorporation into genomic DNA as induced by these  
77 chemotherapeutic treatments is expected to contribute to a better understanding of the cell death  
78 mechanism induced by the respective drugs.

79 Direct observation of the uracil moieties incorporated upon drug treatments have been hampered by the  
80 efficient and fast action of UNG. To overcome this problem, we wished to counteract the action of UNG in  
81 human cells *via* introduction of the UNG inhibitor, UGI (Luo, Walla, & Wyatt, 2008), into the cellular milieu.

82 By this approach we aimed to reveal the nascent pattern of uracil moieties in DNA induced by perturbation  
83 of thymidylate metabolism both using genome-wide uracil-specific sequencing and *in situ* cellular imaging  
84 of uracils within human genomic DNA. Previously, we designed a uracil-DNA (U-DNA) sensor tailored from  
85 an inactive mutant of human UNG2 that was successfully applied in semi-quantitative dot blot analysis and  
86 direct immunocytochemistry (Róna et al., 2016). Some additional approaches have also been published to  
87 detect uracil-DNA within its genomic context such as i) techniques focusing on specific, well-defined regions  
88 of the genome (qPCR (Horváth & Vértessy, 2010) and 3D-PCR (Suspène, Henry, Guillot, Wain-Hobson, &  
89 Vartanian, 2005)), ii) techniques applicable to smaller sized genomes only (Excision-seq (Bryan, Ransom,  
90 Adane, York, & Hesselberth, 2014) and UPD-seq (Sakhtemani et al., 2019)), and iii) techniques requiring  
91 labour-intensive isolation and multistep processing of genomic DNA samples (dU-seq (Shu et al., 2018)).

92 Here, we employ the U-DNA sensor in a DNA-IP-seq-like approach (termed as U-DNA-Seq) and develop  
93 a robust bioinformatic pipeline specifically designed for reliable interpretation of next generation sequencing  
94 data for genome-wide distribution of uracil. We selected two drugs, RTX (raltitrexed, or tomudex) and  
95 5FdUR that perturb thymidylate biosynthesis with different modes of action and analysed their effects on  
96 genomic uracil distribution. These two drugs are frequently applied in treatment of colon cancers, therefore  
97 we chose a human colon carcinoma cell line, HCT116 as a well-established and relevant cellular model.  
98 We show that drug treatment led to increased probability of uracil incorporation into more active chromatin  
99 regions in HCT116 cells expressing the UNG inhibitor protein UGI. In contrast, uracil was rather restricted  
100 to constitutive heterochromatic regions both in wild type cells and in non-treated UGI-expressing cells.  
101 Moreover, we further developed the U-DNA sensor-based staining method (Róna et al., 2016) that now  
102 uniquely allows *in situ* microscopic visualization of uracil in human genomic DNA. Confocal and super-  
103 resolution microscopy images and colocalization measurements strengthened the sequencing-based  
104 distribution patterns.

## 105 MATERIALS AND METHODS

### 106 Plasmid constructs and cloning of the FLAG- $\Delta$ UNG-SNAP construct

107 The pLGC-hUGI/EGFP plasmid was kindly provided by Michael D. Wyatt (South Carolina College of  
108 Pharmacy, University of South Carolina, US). Generation of catalytically inactive U-DNA sensor proteins  
109 (1xFLAG- $\Delta$ UNG, 3xFLAG- $\Delta$ UNG, FLAG- $\Delta$ UNG-DsRed) was described previously (Róna et al., 2016).  
110 pSNAPf (New England Biolabs (NEB), Ipswich, Massachusetts (MA), US) was PCR amplified with primers  
111 SNAP-Fw (5' – TAA TGG TAC CGC GGG CCC GGG ATC CAC CGG TCG CCA CCA TGG ACA AAG ACT  
112 GCG AAA TG - 3') and SNAP-Rev (5' – ATA TCT CGA GGC CTG CAG GAC CCA GCC CAG G - 3'). The  
113 resulting fragments were digested by KpnI and XhoI and ligated into the KpnI/XhoI sites of the plasmid  
114 construct FLAG- $\Delta$ UNG-DsRed (in a pET-20b vector) yielding the FLAG- $\Delta$ UNG-SNAP construct. Scheme  
115 of the used constructs is shown in Supplementary Figure S8A. Primers used in this study were synthesized  
116 by Sigma-Aldrich (St. Louis, Missouri, US) and all constructs were verified by sequencing at Microsynth  
117 Seqlab GmbH (Göttingen, Germany). All UNG constructs were expressed in the *Escherichia coli*  
118 BL21(DE3) *ung-151* strain and purified using Ni-NTA affinity resin (Qiagen, Hilden Germany) as described  
119 previously (Róna et al., 2016).

120

### 121 DNA isolation and purification

122 pEGFP-N1 plasmid (Clontech, Mountain View, California, US) was transformed into XL1-Blue [*dut+*, *ung+*]  
123 (Stratagene, San Diego, California (CA), US) or CJ236 [*dut-*, *ung-*] (NEB) *E. coli* competent cells. Cell  
124 cultures were grown for 16 h in Luria broth (LB) media supplemented with 50  $\mu$ g/ml kanamycin at 37°C.  
125 Plasmids used in this study were purified using PureYield™ Plasmid Midiprep Kit (Promega, Madison,  
126 Wisconsin, US) according to the instructions of the manufacturer. XL1-Blue and CJ236 *E. coli* strains were  
127 propagated in LB media at 37°C and were harvested at log phase. Genomic DNA of bacterial samples as  
128 well as eukaryote cells was purified using the Quick-DNA™ Miniprep Plus Kit (Zymo Research, Irvine,  
129 California, US) using the recommendations of the manufacturer.

130

### 131 Cell culture, transient transfection and treatment of cells

132 The 293T cell line was a generous gift of Yvonne Jones (Cancer Research UK, Oxford, UK). The HCT116  
133 and the K562 cell lines were purchased from the European Collection of Cell Cultures (ECACC, Salisbury,  
134 UK). 293T cells were grown in Dulbecco's modified Eagle's medium (Gibco, Life Technologies, Carlsbad,  
135 CA, US), while HCT116 and K562 cells were maintained in McCoy's 5A medium (Gibco) and RPMI 1640  
136 (GlutaMAX™ Supplement, HEPES) Medium (Gibco), respectively. Media was supplemented with 50  $\mu$ g/ml  
137 Penicillin-Streptomycin (Gibco) and 10% fetal bovine serum (Gibco). Cells were cultured at 37°C in a  
138 humidified incubator with 5% CO<sub>2</sub> atmosphere. HCT116 cells were transfected with FuGENE HD  
139 (Promega) according to the manufacturer's recommendation. For immunocytochemistry, HCT116 cells  
140 were transfected with normal pEGFP-N1 (purified from XL1-Blue [*dut+*, *ung+*] *E. coli* cells) or uracil-rich  
141 pEGFP-N1 (purified from CJ236 [*dut-*, *ung-*] *E. coli* cells) vector as described previously (Róna et al.,

142 2016). Forty hours after transfection with UGI expressing vectors, transiently transfected cells were grown  
143 for an additional 48 h either in the absence or presence of 20  $\mu$ M 5FdUR (Sigma) before collecting them  
144 for genomic DNA purification.

145

#### 146 **Generation of UGI-expressing stable cell line**

147 Retroviral packaging and stable cell line generation was done as described in (Rona et al., 2018). Briefly,  
148 293T cells ( $1.5 \times 10^6$  cells in T25 tissue culture flasks) were transfected with 1.5  $\mu$ g pLGC-hUGI/EGFP,  
149 0.5  $\mu$ g pCMV-VSV-G envelope and 0.5  $\mu$ g pGP packaging plasmids using Lipofectamine 3000 transfection  
150 reagent (Invitrogen, Carlsbad, CA, US) according to the manufacturer's recommendation. The supernatant,  
151 containing lentiviral particles was collected and filtered through a 0.45  $\mu$ m filter (Merck Millipore, Burlington,  
152 MA, US) 36 h after the transfection. Successfully transduced HCT116 were collected by FACS sorting for  
153 GFP-positive cells using a BD FACSAria III Cell sorter (BD Biosciences, San Jose, CA, US). UGI-  
154 expressing cells were treated with 20  $\mu$ M 5FdUR or 100 nM RTX (Sigma) for 48 h before fixation for  
155 immunocytochemistry or collecting them for genomic DNA purification described above.

156

#### 157 **Dot blot measurements and analysis for quantification of U-DNA**

158 Detection of the genomic uracil content by dot blot measurements were carried out using 3xFLAG- $\Delta$ UNG  
159 construct, as described earlier (Róna et al., 2016). Dot blot assay was used for measuring genomic uracil  
160 levels of non-treated and drug (5FdUR or RTX) treated HCT116 cells expressing UGI (Supplementary  
161 Figure S1B), or to confirm the successful enrichment of uracil containing DNA (Figure 1B) and also to  
162 compare uracil recognition specificity of the FLAG- $\Delta$ UNG-DsRed and FLAG- $\Delta$ UNG-SNAP constructs  
163 (Supplementary Figure S8B). Densitometry was done using ImageJ (Fiji) software (National Institutes of  
164 Health, US). Analysis of the data and the calculation of the number of deoxyuridine nucleotides in the  
165 unknown genomic DNA was described before (Molnár, Marton, Izrael, Pálinkás, & Vértessy, 2018; Róna et  
166 al., 2016). Briefly, the number of uracil/million bases in the unknown samples were determined by  
167 interpolating their normalized intensities to the calibration curve of the standard. Statistical analysis of dot  
168 blot (Supplementary Figure S1C) was carried out by Microsoft Excel using the non-parametric two-sided  
169 Mann-Whitney U test. Differences were considered statistically significant at  $p < 0.005$ . Data presented are  
170 representative of six independent datasets ( $n = 6$ ).

171

#### 172 **DNA immunoprecipitation**

173 After 48h treatment, the surface attached cells were harvested. Genomic DNA was purified by Quick-DNA™  
174 Miniprep Plus Kit (Zymo Research) and eluted in nuclease-free water. 12  $\mu$ g of genomic DNA was sonicated  
175 into fragments ranging between 100 and 500 basepairs (bp) (checked by agarose gel electrophoresis) with  
176 a BioRuptor (Diagenode, Liège, Belgium). 25% of the samples was saved as input, and the remaining DNA  
177 was resuspended in the following IP buffer: 30 mM Tris-HCl, pH = 7.4, 140 mM NaCl, 0.01% Tween-20,  
178 1 mM ethylenediaminetetraacetic acid (EDTA), 15 mM  $\beta$ -mercaptoethanol, 1 mM phenylmethylsulfonyl

179 fluoride, 5 mM benzamidine. Immunoprecipitations were carried out with 15 µg of 1xFLAG-ΔUNG construct  
180 for 2.5 h at room temperature with constant rotation. Anti-FLAG M2 agarose beads (Sigma) were  
181 equilibrated in IP buffer and then added to the IP mixture for 16 h at 4°C with constant rotation. Beads were  
182 washed three times for 10 min in IP buffer and resuspended in elution buffer containing 1% sodium dodecyl  
183 sulphate (SDS), 0.1 M NaHCO<sub>3</sub>. Elution of uracil sensor protein binding U-DNA was done by vortexing for  
184 5 min with an additional incubation for 20 min with constant rotation. After centrifugation (13000 rpm for  
185 3 min), supernatant was transferred to clean tubes. This procedure was repeated with the same amount of  
186 elution buffer and protein/DNA eluted complexes were combined in the same tube. Samples were incubated  
187 with 150 µg/ml RNase A (Epicentre, Paris, France) for 30 min, followed by the addition of 500 µg/ml  
188 Proteinase K (Sigma) for 1 h at 37°C for removal of RNA and proteins. Immunoprecipitated DNA was  
189 purified with NucleoSpin Gel and PCR Clean-up Kit (MACHEREY-NAGEL GmbH & Co. KG, Düren,  
190 Germany) according to the manufacturer's instructions. Densitometry analysis of agarose gel was done  
191 using ImageJ (Fiji) software for concentration calculation of fragmented DNA. Enrichment of uracil in the  
192 DNA samples was examined by dot blot assay. DNA libraries were created from the samples and then  
193 subjected to next-generation sequencing (NGS). Scheme of U-DNA-Seq is shown in Figure 1A.

194

#### 195 **High-throughput DNA sequencing and data analysis**

196 Sequencing of input and enriched U-DNA samples were done on two independent biological replicates at  
197 BGI (China) generating 100 bp paired-end reads (PE) on a HiSeq 4000 instrument or at Novogene (China)  
198 using the Novaseq 6000 platform resulting in 150 bp PE reads. Analysis pipeline is summarized in Figure 2,  
199 and details including the applied command lines and scripts are found in the Supplementary Material.  
200 Sequencing reads were aligned to the GRCh38 human reference genome (version GRCh38.d1.vd1)  
201 (Jensen, Ferretti, Grossman, & Staudt, 2017) using BWA (version 0.7.17) (Li & Durbin, 2010). Aligned reads  
202 were converted to BAM format and sorted using samtools (version 1.9) (Li et al., 2009). Duplicate reads  
203 were marked using Picard Tools (version 1.95). As a part of pre-processing, blacklisting and filtering of  
204 ambiguously mapped reads were also performed (cf. Supplementary Material and Supplementary  
205 Figure S3). For data processing, to derive uracil distribution signal, first, normalized coverage signals were  
206 calculated and smoothed using bamCoverage from the deepTools package (Ramírez et al., 2016), which  
207 resulted in genome-scaled coverage tracks in bigWig format. Then, log<sub>2</sub> ratio of the coverage tracks  
208 (enriched / input) were calculated with bigWigCompare. These bigwig files were compared using the  
209 multiBigWigSummary, Pearson correlations were calculated using the plotCorrelation tools also from the  
210 deepTools package (Figure 3B). From the log<sub>2</sub> ratio tracks, interval (bed) files were derived using  
211 reasonable thresholds (for details see the Supplementary Material and Supplementary Table S3A). Log<sub>2</sub>  
212 ratio signal distribution (Figure 3C) was calculated using R. Peaks of coverage were also called using the  
213 MACS2 with broad option (version 2.1.2), a standard tool in chromatin marker ChIP-seq data  
214 analysis (Zhang et al., 2008). Results of peak calling and the regions derived from the log<sub>2</sub> ratio tracks were  
215 compared (Supplementary Table S3). Hereafter, the two terms 'peak' and 'region' will be consequently



216 applied for the results of the two approaches, respectively. Colocalization analysis of identified uracil  
217 enriched regions with other ChIP-seq and DNA accessibility data was performed on a dataset containing  
218 HCT116 specific or other relevant data only (for details see Supplementary Material) using GIGGLE search  
219 tool (Layer et al., 2018). To plot results of GIGGLE search, OriginPro 8.6 was used (Figure 4A). Measuring  
220 overlaps with other genomic features (Figure 4B) was done using bedtools annotate tool (Quinlan & Hall,  
221 2010) as it is described in Supplementary Material. Correlation analysis between uracil enrichment and  
222 replication timing (Figure 4C and Supplementary Figure S11C) was done using R as it is described in  
223 Supplementary Material. Sequencing data were visualized (Figure 3A, Supplementary Figures S3, S5, S6,  
224 S10A, S11A) using the IGV browser (Thorvaldsdóttir, Robinson, & Mesirov, 2013).

225

### 226 **Immunofluorescent staining of uracil residues**

227 Detection of uracil residues was done in extrachromosomal plasmids after transfection (Supplementary  
228 Figure S8C) or in genomic DNA of HCT116 cells (Figure 5-7). Staining of extrachromosomal DNA was  
229 done as described previously (Róna et al., 2016) with minor modifications for comparison of FLAG- $\Delta$ UNG-  
230 DsRed or FLAG- $\Delta$ UNG-SNAP sensor constructs. Briefly, uracil residues were visualized by applying  
231 1.5  $\mu$ g/ml of the FLAG- $\Delta$ UNG-DsRed or the FLAG- $\Delta$ UNG-SNAP, and then primary (anti-FLAG M2 antibody  
232 (1:10000, Sigma) and secondary antibodies (Alexa 488 (1:1000, Molecular Probes, Eugene, Oregon, US)).  
233 For immunofluorescent staining of genomic uracil residues, control or HCT116 cells stably expressing UGI  
234 were seeded onto 24-well plates containing cover glasses or onto  $\mu$ -Slides (or their glass bottom derivative)  
235 (ibidi GmbH, Germany) suitable for use in STED and single molecule applications, and treated as indicated.  
236 In case of dSTORM imaging, coverslips were coated with poly-D-lysine (Merck Millipore) before seeding  
237 the cells. Sub-confluent cultures of cells were fixed using 4% paraformaldehyde (PFA, pH = 7.4 in  
238 phosphate-buffered saline (PBS)) or Carnoy's fixative (ethanol: acetic acid: chloroform = 6:3:1) for 15 min.  
239 In case of dSTORM imaging, cells were pre-extracted with ice-cold CSK buffer (10 mM PIPES, pH = 6.8,  
240 100 mM NaCl, 300 mM sucrose, 1 mM EGTA, 3 mM MgCl<sub>2</sub>, 0.25% Triton X-100) containing protease and  
241 phosphatase inhibitor tablets (Roche, Basel, Switzerland) for 5 min before PFA fixation. After washing or  
242 rehydration steps (1:1 ethanol:PBS, 3:7 ethanol:PBS, PBS), epitope unmasking was done by applying 2 M  
243 HCl, 0.5% Triton X-100 for 30 min. DNA denaturation with HCl was required in order to increase DNA  
244 accessibility for efficient staining and to eliminate any potential interaction between the overexpressed UGI  
245 and the applied UNG sensor construct. After neutralization with 0.1 M Na<sub>2</sub>B<sub>4</sub>O<sub>7</sub> (pH = 8.5) for 5 min followed  
246 by PBS washes, cells were incubated in blocking solution I (TBS-T (50 mM Tris-HCl, pH = 7.4, 2.7 mM KCl,  
247 137 mM NaCl, 0.05% Triton X-100) containing 5% non-fat dried milk) for 15 min, followed by incubation in  
248 blocking buffer I supplemented with 200  $\mu$ g/ml salmon sperm DNA (Invitrogen) for an additional 45 min.  
249 Uracil residues were visualized by applying 4  $\mu$ g/ml of the FLAG- $\Delta$ UNG-SNAP construct for 1 h in blocking  
250 buffer I with 200  $\mu$ g/ml salmon sperm DNA at room temperature. After several washing steps with TBS-T  
251 containing 200  $\mu$ g/ml salmon sperm DNA, primary, then secondary antibodies were operated in blocking  
252 buffer II (5% fetal goat serum (FGS), 3% fetal bovine serum albumin (BSA) and 0.05% Triton X-100 in



253 PBS). Anti-FLAG M2 antibody (1:10000, Sigma), then Alexa 488 conjugated secondary antibody (1:1000,  
254 Molecular Probes) was applied for 1 h in blocking buffer II, enabling visualization of FLAG epitope. SNAP-  
255 tag substrates were also used to label SNAP-tag fusion proteins when FLAG- $\Delta$ UNG-SNAP was applied as  
256 the uracil sensor protein. Cells were labelled with 2.5  $\mu$ M (0.5  $\mu$ M for dSTORM imaging) SNAP-Surface  
257 Alexa Fluor 546 or 647 (indicated as SNAP546 and SNAP647 in this study) (NEB) for 20 min and optionally  
258 counterstained with 1  $\mu$ g/ml DAPI (4',6-diamidino-2-phenylindole, Sigma) nucleic acid stain, followed by  
259 several PBS washing steps before embedding in FluorSave™ Reagent (Calbiochem, Merck Millipore). For  
260 labelling of histone markers, anti-H3K36me3 (1:8000, CST (Danvers, MA, US), cat.no.: 4909T) or anti-  
261 H3K27me3 (1:6000, CST, cat.no.: 9733T) primary antibodies were used, then visualized by Alexa 568  
262 conjugated secondary antibody (1:10000, Molecular Probes) in dSTORM or Alexa 555 conjugated  
263 secondary antibody (1:2000, Molecular Probes) in confocal imaging.

264

### 265 **Confocal and STED imaging and analysis**

266 Confocal images were acquired on a Zeiss LSCM 710 microscope using a 20x (NA = 0.8) or a 63x  
267 (NA = 1.4) Plan Apo objective or a Leica TCS SP8 STED 3X microscope using a 100x (NA = 1.4) Plan Apo  
268 objective. STED images were acquired on the Leica TCS SP8 STED 3X microscope using 660 nm STED  
269 (1.5 W, continuous wave) laser for depletion (in combination with Alexa 546). The same image acquisition  
270 settings were applied on each sample for comparison. A moderate degree of deconvolution was applied to  
271 the recorded STED images using the Huygens STED Deconvolution Wizard (Huygens Software), based  
272 on theoretical point spread function (PSF) values. Fluorescence images were processed using ZEN and  
273 ImageJ (Fiji) software. 3D projection movies (Supplementary Movies) were constructed from Z-stack  
274 images captured by confocal or STED imaging.

275

### 276 **dSTORM imaging and image reconstruction**

277 Super-resolution images were obtained and reconstructed as previously described (Rona et al., 2018).  
278 Briefly, dSTORM images were recorded using an in-house built imaging platform based around an inverted  
279 microscope. Two colour imaging was carried out sequentially on samples labelled with SNAP-Surface Alexa  
280 Fluor 647 and Alexa Fluor 568. The imaging buffer, consisting of 1 mg/ml glucose oxidase, 0.02 mg/ml  
281 catalase, 10% glucose, 100 mM mercaptoethylamine (MEA) in PBS, was mixed and added just before  
282 imaging. For display purposes, super-resolution images shown in the manuscript have been adjusted for  
283 brightness and smoothed; however, quantitative analysis were performed on images before being manually  
284 processed to avoid any user bias.

285

### 286 **Interaction factor**

287 The interaction factor (IF) quantifies the colocalization of red and green foci within a cell nucleus by  
288 measuring the area of overlap between the two sets of foci (Bermudez-Hernandez et al., 2017; Whelan et  
289 al., 2018). The positions of the green foci are then randomized and the overlap between the two colours is

290 measured again. This randomization is repeated 20 times and the interaction factor is the ratio between the  
291 experimental overlap area and the mean of the randomized overlap areas. If the red and green foci were  
292 completely independent of each other, the IF value would equal one. A value greater than one signifies a  
293 higher degree of colocalization compared to a random sample. Non-parametric Mann-Whitney U test was  
294 used to calculate statistics on the graphs. Differences of the IF values were considered statistically  
295 significant at  $p < 0.0001$  as indicated in Figure 7C-D. Data are presented from two independent biological  
296 experiments.  
297  
298

299 **RESULTS**

300 **Genome-wide mapping of uracil-DNA distribution patterns by U-DNA-Seq**

301 We designed an adequate DNA immunoprecipitation method that can provide U-DNA specific genomic  
302 information by next-generation sequencing. This method, termed U-DNA-Seq is based on the rationale of  
303 the well-established DIP-Seq technology. Figure 1A presents the scheme of the protocol leading to an  
304 enriched U-DNA sample that was then subjected to NGS. Immunoprecipitation was carried out by applying  
305 the FLAG-tagged catalytically inactive  $\Delta$ UNG sensor (described in (Róna et al., 2016)) to bind to uracil in  
306 purified and fragmented genomic DNA, followed by a pull-down with anti-FLAG agarose beads.

307 To allow better detection of nascent uracil, the UNG-inhibitor UGI (derived from *Bacillus subtilis*  
308 bacteriophage PBS2) was expressed in HCT116 cells to prevent the action of the major uracil-DNA  
309 glycosylase. Besides transient transfection, a stably UGI transfected HCT116 cell line was also established  
310 by retroviral transduction of human codon optimized UGI along with EGFP (Supplementary Figure S1A).  
311 We proceeded to treat the UGI expressing cells with either 5FdUR or RTX. Notably, this combination of  
312 UGI expression and drug treatment did not result in any observable cell death. As shown in Supplementary  
313 Figure S1B-C, UGI expression and drug (5FdUR or RTX) treatment led to significantly increased uracil  
314 content in genomic DNA. It is important to note that either UGI expression or treatments with drugs targeting  
315 *de novo* thymidylate biosynthesis pathways on their own do not lead to elevated U-DNA level (Luo, Walla,  
316 & Wyatt, 2008; Róna et al., 2016; Yan et al., 2016). Following U-DNA immunoprecipitation, successful  
317 enrichment of U-DNA could be confirmed by dot blot assay in the case of drug-treated cells (5FdUR\_UGI  
318 or RTX\_UGI, Figure 1B). Specificity of U-DNA immunoprecipitation is also underlined by the fact that pull  
319 down with empty anti-FLAG beads not containing the U-DNA sensor resulted in negligible amount of DNA  
320 (less than 5%). Then, enriched and input DNA samples both from treated (5FdUR\_UGI and RTX\_UGI) and  
321 non-treated (wild type (WT) and NT\_UGI) samples were subjected to library preparation and NGS.

**A**

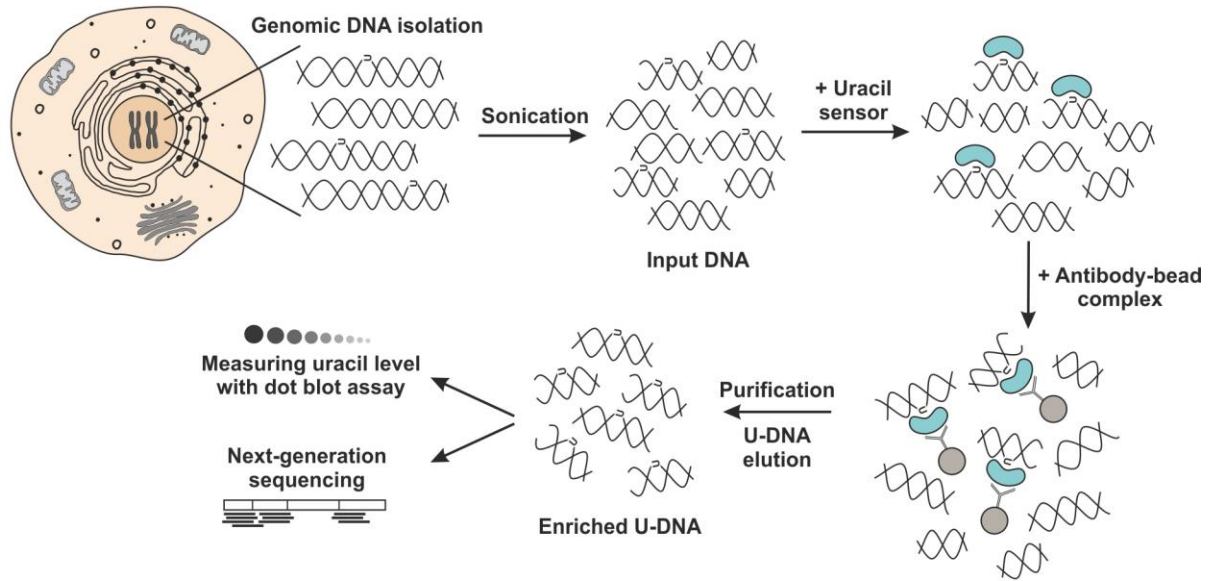

**B**

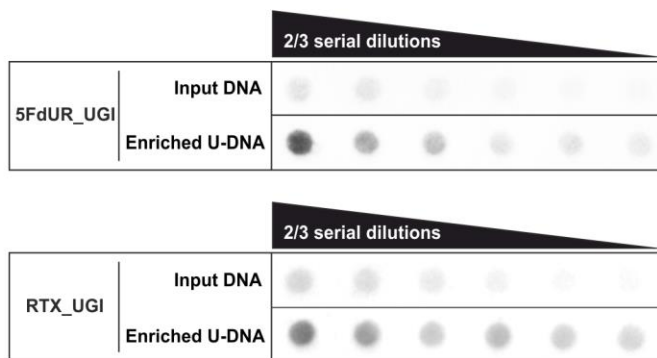

322

323

324 **Figure 1. U-DNA-Seq provides genome-wide mapping of uracil-DNA distribution. (A)** Schematic  
 325 image of the novel U-DNA immunoprecipitation and sequencing method (U-DNA-Seq). After sonication,  
 326 enrichment of the fragmented U-DNA was carried out by the 1xFLAG-ΔUNG sensor construct followed by  
 327 pull-down with anti-FLAG agarose beads. U-DNA enrichment compared to input DNA was confirmed by  
 328 dot blot assay before samples were subjected to NGS. **(B)** Immunoprecipitation led to elevated uracil levels  
 329 in enriched U-DNA samples compared to input DNA in case of both 5FdUR (5FdUR\_UGI) and RTX  
 330 (RTX\_UGI) treated samples. In case of the given treatment, the same amount of DNA was loaded from  
 331 input and enriched U-DNA samples providing correct visual comparison of the dots. Two-third serial  
 332 dilutions were applied.  
 333

334 Sequencing data were analysed using the herein developed computational pipeline shown in Figure 2 (for  
 335 more details see the Supplementary Figure S2 and Supplementary Table S1). When reads were aligned  
 336 to the reference GRCh38 human genome, only uniquely mapped reads were kept and regions suffering  
 337 from alignment artefacts were excluded from the analysis by blacklisting (Supplementary Figure S3).  
 338 Statistics on pre-processing steps are shown in Supplementary Table S2. Correlation among the samples  
 339 and replicates at the level of cleaned aligned reads (bam files) was checked by Pearson correlation analysis

340 (for details see Supplementary Figure S4). Here, a clear difference was shown between the input and the  
341 enriched samples; input samples were more similar to each other regardless the applied treatment, while  
342 the drug-treated and non-treated enriched samples showed dramatic differences.

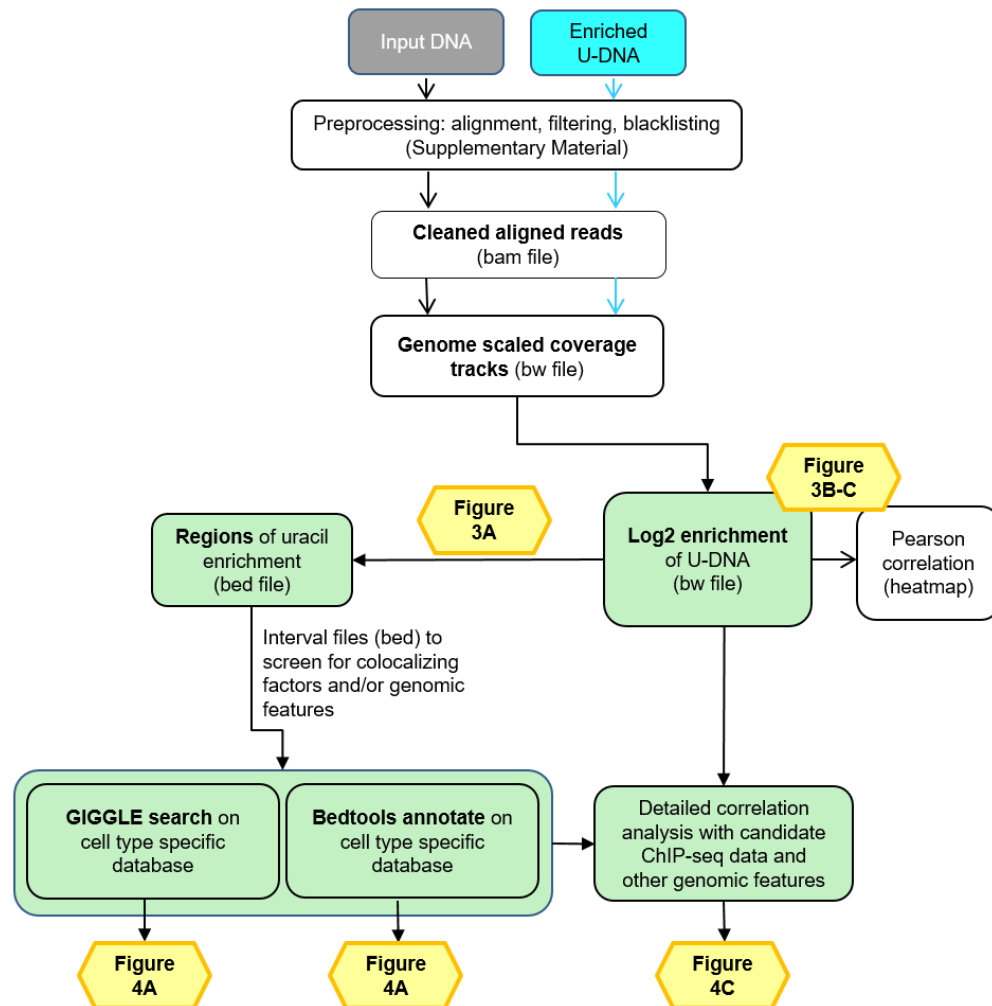

343  
344

345 **Figure 2. Data analysis pipeline.** Both input and enriched U-DNA samples were pre-processed the same  
346 way: initial trimming and alignment were followed by filtering for uniquely mapped reads and blacklisting of  
347 regions suffering from alignment artefacts, resulting in cleaned aligned reads in the format of bam files. The  
348 key steps of our proposed data processing are 1) calculation of genome scaled coverage tracks (bigwig/bw  
349 files), 2) calculation of log<sub>2</sub> (enriched coverage / input coverage) ratio tracks (bigwig/bw files), 3) extraction  
350 of interval (bed) files of uracil enriched regions from the corresponding log<sub>2</sub> ratio tracks. To correlate the  
351 uracil enrichment profiles with other published data, first quick screens using interval files were done, and  
352 then detailed correlation analysis with a promising candidate of colocalizing genomic features was  
353 performed using coverage track files. GIGGLE search (Layer et al., 2018) and bedtools annotate (Quinlan  
354 & Hall, 2010) were used for scoring the similarities between query uracil-DNA and the database interval  
355 files. Figures corresponding to the different analysis steps are also indicated. A more detailed pipeline is  
356 shown in Supplementary Figure S2, and the full methodology is described in the Supplementary Material.  
357

358 There are two principal approaches to extract the signals of uracil enrichment from the cleaned aligned  
359 reads: 1) computing genome scaled coverage and log<sub>2</sub> ratio tracks, and 2) peak calling that is

360 conventionally used for ChIP-seq data analysis. Log2 ratio tracks provide more detailed information on the  
361 uracil-DNA distribution patterns, however, it is not compatible with efficient screening on large dataset  
362 (Figure 2 and Supplementary Figure S2). Hence, we generated interval (bed) files from these log2 ratio  
363 tracks for each sample that contain simplified information on uracil enriched regions as described in the  
364 Supplementary Material. Then, we evaluated both the regions derived from the log2 ratio tracks, and the  
365 peak calling results (Supplementary Figure S5 and Supplementary Table S3). We found that the uracil  
366 enriched genomic regions are rather broad and much less intense than conventional peaks in ChIP-seq for  
367 transcription factors or even for histone modifications. This is somehow expected considering basically  
368 stochastic nature of uracil occurrence via both misincorporation and spontaneous cytosine deamination. In  
369 agreement with this, reliability and reproducibility of the peak calling approach (using MACS2 with “broad”  
370 option) was found to be clearly suboptimal for determination of uracil distribution patterns (Supplementary  
371 Figure S5 and Supplementary Table S3). Therefore, we decided to proceed with the coverage track  
372 approach rather than the peak calling. All of the main figures rely on analysis performed with either the log2  
373 ratio tracks or the regions of uracil enrichment derived from the log2 ratio tracks.

374 The log2 ratio tracks were generated by comparing the genome scaled sequencing coverages of the  
375 enriched U-DNA and the input sample (for details see Supplementary Material). Figure 3A shows the uracil  
376 distribution pattern in a selected chromosomal segment where an uneven distribution with variably spaced  
377 broad regions is observed (the same data for all the chromosomes are shown in Supplementary Figure S6).  
378 A clear difference between non-treated (WT and NT\_UGI) and treated (5FdUR\_UGI and RTX\_UGI) cells  
379 is already obvious from this view, and the correlations were also measured quantitatively on the whole log2  
380 ratio tracks by Pearson correlation coefficients and related scatter plots (Figure 3B, for individual replicates  
381 see Supplementary Figure S7).

382 The uracil-enrichment coverage tracks in Figure 3A and the related correlations in Figure 3B already  
383 suggested altered distribution of uracil-containing regions in the drug-treated (5FdUR\_UGI and RTX\_UGI)  
384 as compared to the non-treated (WT and NT\_UGI) samples. This difference was further underlined in a  
385 histogram representation of uracil enrichment signal (Figure 3C) where drug treatment led to a higher  
386 number of genomic segments (more data bins) with increased uracil level. It was of immediate interest to  
387 investigate whether the uracil distribution patterns, distinctly characteristic for the non-treated versus drug-  
388 treated samples might show any correlation to any previously determined genomic features. For this  
389 reason, we built a relevant database by collecting cell type specific ChIP-seq and DNA accessibility data  
390 (for details see Supplementary Material), since epigenetic modifications and regulation occur in diverse  
391 fashion in different cell types.



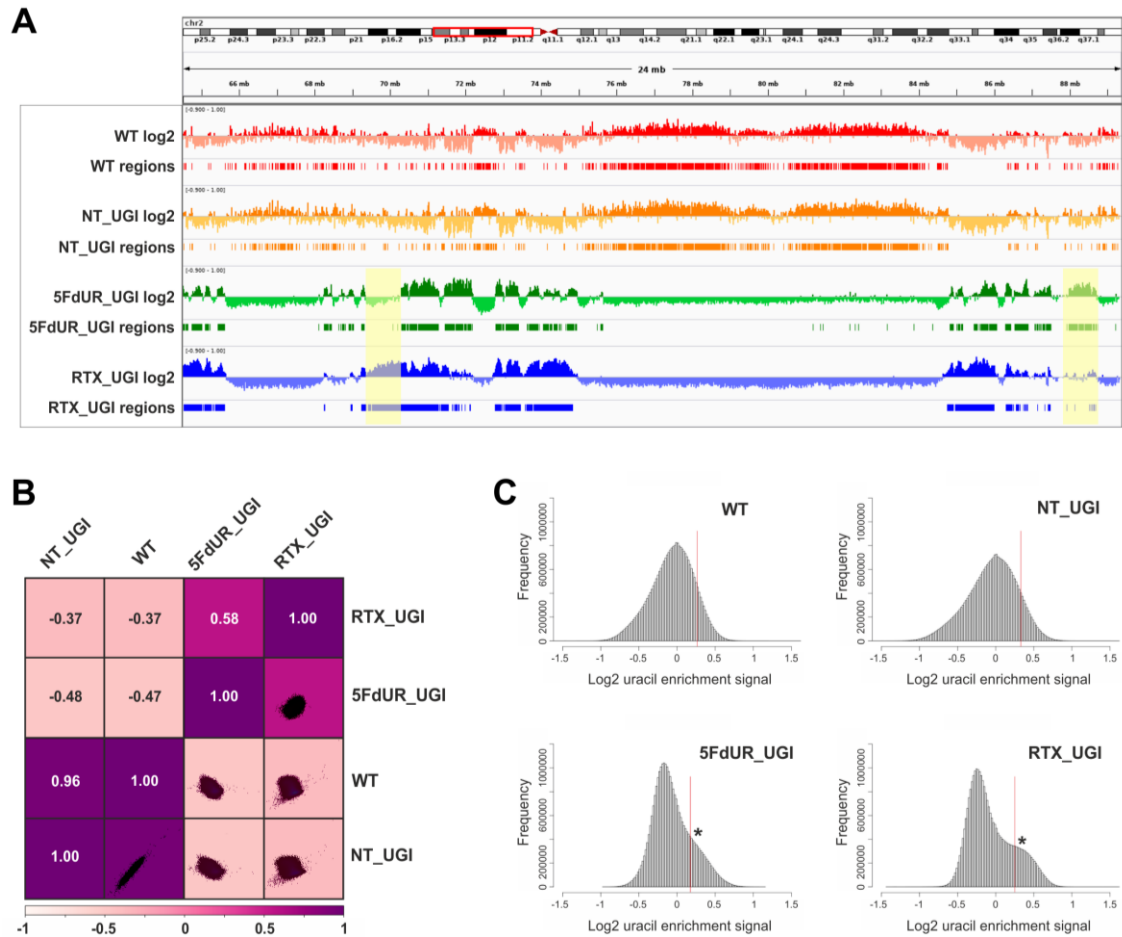

392

393

394 **Figure 3. Comparison of processed U-DNA-Seq data among samples (A)** Representative IGV view on  
 395 the log<sub>2</sub> ratio and the derived regions of uracil enrichment (two replicates for each sample were merged).  
 396 Log<sub>2</sub> ratio signal tracks of enriched versus input coverage (log<sub>2</sub>, upper track) and derived regions of uracil  
 397 enrichment (regions, bottom track) for non-treated: wild type (WT, red) and UGI-expressing (NT\_UGI,  
 398 orange); and for treated: with 5FdUR (5FdUR\_UGI, green) or raltitrexed (RTX\_UGI, blue) HCT116 samples  
 399 are shown in genomic segment (chr2:64,500,000-89,500,001). Differences between treated and non-  
 400 treated samples are clearly visible. Furthermore, 5FdUR and RTX treatments caused similar but not  
 401 identical uracil enrichment profile (differences are highlighted with yellow background). **(B)** Comparison of  
 402 log<sub>2</sub> uracil enrichment profiles among samples was performed using multiBigWigSummary (deepTools)  
 403 and Pearson correlation were plotted using plotCorrelation (deepTools). A heatmap combined with  
 404 scatterplots is shown for the four samples. **(C)** Histograms of log<sub>2</sub> ratio profiles were calculated and plotted  
 405 using R. A sub-population of data bins with elevated log<sub>2</sub> uracil enrichment signal is clearly visible (indicated  
 406 with asterisk) in case of drug-treated samples, where high uracil incorporation was detected  
 407 (cf. Supplementary Figure S1B-C). Thresholds applied in determination of uracil enriched regions are  
 408 indicated with red line (cf. Supplementary Table S3A).  
 409

410 Interrogation of the constructed specialized database with respect to the uracil-DNA distribution patterns  
 411 was performed using interval (bed) files of uracil enriched regions (derived from log<sub>2</sub> ratio track) for each  
 412 U-DNA-Seq sample. To screen for similarity between sample and database interval (bed) files, we applied  
 413 the GIGGLE search tool (full data are presented in Supplementary Appendix 2). GIGGLE scores are

414 capable to adequately represent the measure of colocalization independently from the size of the compared  
415 intervals (Layer et al., 2018). Each interval file in the database corresponded to one specific ChIP-seq  
416 experiment with a given factor (e.g. histone markers, transcription factors, etc.). GIGGLE scores were then  
417 calculated pairwise (each sample to each database interval files), and plotted for the top ten factors  
418 corresponding to the highest scores (Figure 4A). The similarity scores of the U-DNA-Seq data with regard  
419 to the different chromatin markers indicate that non-treated cells (WT and NT\_UGI) may possess uracils  
420 preferentially in the constitutive heterochromatin (high scores with H3K9me2 and H3K9me3 (Hyun, Jeon,  
421 Park, & Kim, 2017; Saksouk, Simboeck, & Déjardin, 2015)). On the other hand, drug treatment of the cells  
422 either with 5FdUR (5FdUR\_UGI) or RTX (RTX\_UGI), induces uracil incorporation into more active genomic  
423 segments, correlated with high similarity scores to euchromatin histone marks (H3K36me3 (Becker et al.,  
424 2017; Hyun et al., 2017; Pfister et al., 2014), H3K4me1/3 (Hyun et al., 2017), H3K27ac (Creighton et al.,  
425 2010), H3K9ac (Gates et al., 2017)), or factors associated to either activation or repression in a context  
426 dependent manner (SP1 (Doetzlhofer et al., 1999), H3K27me3 (Becker et al., 2017; Saksouk et al., 2015),  
427 H2AZ/AFZ (Giaimo, Ferrante, Herchenröther, Hake, & Borggreffe, 2019)) (Figure 4A).

428 Based on the detected correlation with hetero- and euchromatin in case of non-treated and drug-treated  
429 cells, respectively, we wished to determine whether it might be reflected in other, more generalized genomic  
430 features also. Therefore, we investigated colocalization of U-DNA enriched regions with several genomic  
431 features using bedtools annotate (Quinlan & Hall, 2010) to extract the number of overlapping bases. Scores  
432 measuring the colocalization are presented in Figure 4B for a systematic selection of the tested features.  
433 The results of the full analysis are provided in Supplementary Table S4. The data suggest that uracil  
434 incorporation in transcriptionally active (e.g. active promoters, DNase hypersensitive sites), and potentially  
435 active genomic segments (CpG islands, genes, especially exons and CDS regions) is increased upon drug  
436 treatment. The proposed uracil enrichment in transcriptionally active genomic regions is also in agreement  
437 with the colocalization with different repeat classes: the drug-treated samples show higher colocalization  
438 with short interspersed elements (SINE (Kramerov & Vassetzky, 2005)) and long terminal repeats  
439 (LTR (Kovalskaya, Buzdin, Gogvadze, Vinogradova, & Sverdlov, 2006)) which are known to be more  
440 frequently transcribed as compared to long interspersed element (LINE (Boissinot & Furano, 2005)) and  
441 Satellite segments (López-Flores & Garrido-Ramos, 2012).

442 The observed similarity between wild type uracil distribution and the patterns of histone markers associated  
443 with heterochromatin (Figure 4A) is further underlined by the positive correlation between U-DNA and  
444 cytogenic chromosome G-bands (Figure 4B). Dark G-bands stained strongly by Giemsa was shown to  
445 correlate with AT-rich, heterochromatic, late replicating genomic segments (Gilbert, 2002; Holmquist, Gray,  
446 Porter, & Jordan, 1982). In contrast, negative G-bands are correlated better to the drug-treated uracil-DNA  
447 distribution pattern, also in agreement with our results from the comparison to histone markers.  
448 Consistently, similar difference between patterns of U-DNA in non-treated versus drug-treated cells in early  
449 or late replicating genomic segments is also revealed. Late replicating regions are better correlated to the

450 U-DNA distribution in non-treated cells, while the drug treatment induced U-DNA pattern is more similar to  
 451 the early replicating segments (Figure 4B). It is widely accepted that replication timing strongly correlates  
 452 with chromatin structure, namely the open euchromatin and the condensed heterochromatin replicates in  
 453 early and late S-phase, respectively (Gilbert, 2002). The correlation between U-DNA enrichment and  
 454 replication timing was further analysed using a better resolved time scale of replication (Figure 4C) which  
 455 strengthened the initial observation. The correlations with G-banding and replication timing are also clearly  
 456 visible on IGV views in Supplementary Figure S6. Furthermore, colocalization with AT-rich heterochromatin  
 457 for non-treated and GC-rich euchromatin for drug-treated samples is also reflected by the base composition  
 458 of uracil enriched regions (Supplementary Table S3A). The surprisingly high correlation between uracil  
 459 enrichment in drug-treated cells and CpG islands (cf. Figure 4B) coincides with the elevated GC content of  
 460 uracil enriched genomic regions in these samples.

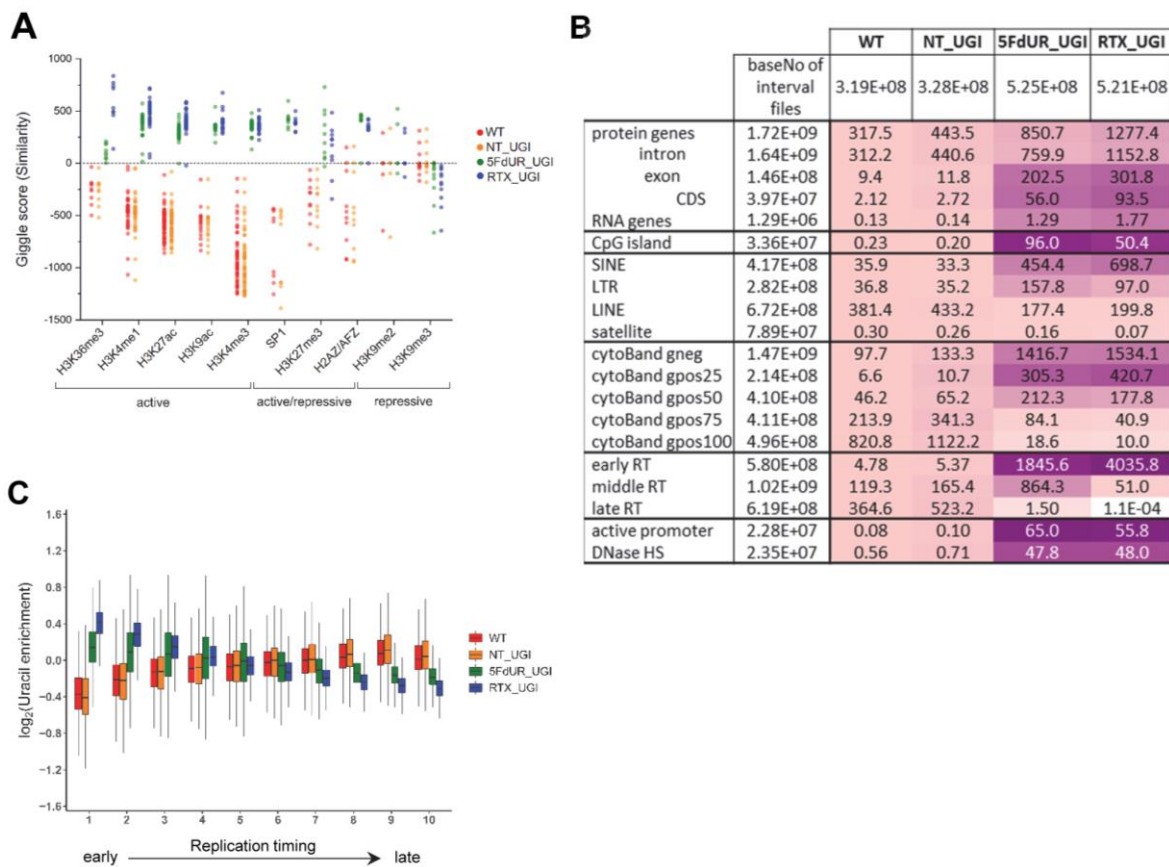

461

462 **Figure 4. Characterization of U-DNA enrichment patterns.** (A) Top hs from GIGGLE search on HCT116  
 463 specific dataset. GIGGLE search was performed with interval (bed) files of uracil enriched regions on a set  
 464 of HCT116 related ChIP-seq and DIP-seq experiment data (for details see the Supplementary Material).  
 465 Factors corresponding to the top 10 hits for each sample were selected. GIGGLE scores between all four  
 466 samples and all experiments corresponding to these factors were plotted excluding CNOT3, H2B,  
 467 H3K27me1/2 where data were not informative (data are found in Supplementary Material Appendix 2).  
 468 Histone marks and the only transcription factor, SP1 are categorized depending on their occurrence in  
 469 transcriptionally active or repressive regions. Notably, some of them have plastic behaviour allowing either

470 transcriptionally active or repressive function. U-DNA-Seq samples are as follows: non-treated wild type  
471 (WT, red), non-treated UGI-expressing (NT\_UGI, orange), 5FdUR treated UGI-expressing (5FdUR\_UGI,  
472 green), and RTX treated UGI-expressing (RTX\_UGI, blue) HCT116 cells. **(B)** Correlation with genomic  
473 features. Interval (bed) files of genomic features were obtained from UCSC, Ensembl, and  
474 ReplicationDomain databases (for details see the Supplementary Material), and correlation with interval  
475 files of uracil regions were analysed using bedtools annotate software. Numbers of overlapping basepairs  
476 were summarized for each pair of interval files, and scores were calculated according the formula:  
477  $(\text{baseNo\_overlap}/\text{baseNo\_sample\_file}) * (\text{baseNo\_overlap}/\text{baseNo\_feature\_file}) * 10000$ . Heatmaps were  
478 created based on fold increase of the scores compared to the corresponding WT scores. Sizes of interval  
479 files in number of basepairs are also given in the second column and the second line. Upon drug treatments,  
480 a clear shift from non-coding / heterochromatic / late replicated segments towards more active / coding /  
481 euchromatic / early replicated segments can be seen. CDS, coding sequence; SINE, short interspersed  
482 element; LTR, long terminal repeat; LINE, long interspersed element; cytoBand, cytogenic chromosome  
483 band negatively (gneg) or positively (gpos) stained by Giemsa; RT, replication timing; DNaseHS, DNase  
484 hypersensitive site. **(C)** Correlation analysis with replication timing. Replication timing data (bigWig files with  
485 5000 bp binsize) specific for HCT116 were downloaded from ReplicationDomain database. Data bins were  
486 distributed to 10 equal size groups according to replication timing from early to late. Then log2 uracil  
487 enrichment signals for these data bin groups were plotted for each sample using R.  
488

489

490 ***In situ* detection of U-DNA using super-resolution microscopy**

491 We aimed to correlate genome-wide uracil distribution patterns with *in situ* localization in the context of  
492 chromatin architecture. Therefore, we further develop the U-DNA sensor constructs (Róna et al., 2016) to  
493 allow *in situ* detection of genomic U-DNA in complex eukaryotic cells using microscopy. Figure 5A shows  
494 a schematic representation of the U-DNA staining procedure. The U-DNA sensor constructs were fused to  
495 different tags allowing antibody-based or direct detection via fluorescence microscopy. In order to achieve  
496 a versatile labelling technique to facilitate super-resolution imaging of U-DNA, we attached SNAP-tag to  
497 the C-terminal end of  $\Delta$ UNG yielding FLAG- $\Delta$ UNG-SNAP, generating a novel sensor construct  
498 (Supplementary Figure S8A). The SNAP-tag offers a flexible biorthogonal chemical labelling strategy as it  
499 reacts specifically and covalently with benzylguanine derivatives, permitting the irreversible labelling of  
500 SNAP fusion proteins with a wide variety of synthetic probes (Keppler et al., 2003). In order to check  
501 whether the functionality of this new construct is still preserved, we performed dot blot and staining  
502 experiments. Results shown in Supplementary Figure S8B indicate that the FLAG- $\Delta$ UNG-SNAP construct  
503 is functional and shows similarly reliable U-DNA detection using dot blot approach, when compared to  
504 FLAG- $\Delta$ UNG-DsRed protein described previously (Róna et al., 2016). Supplementary Figure S8C shows  
505 that the new labelling construct, FLAG- $\Delta$ UNG-SNAP, also recognizes the presence of extrachromosomal  
506 uracil enriched plasmid aggregates in the cytoplasm. These results confirmed that the FLAG- $\Delta$ UNG-SNAP  
507 construct is capable of U-DNA detection in dot blot assays and suitable for *in situ* staining applications.



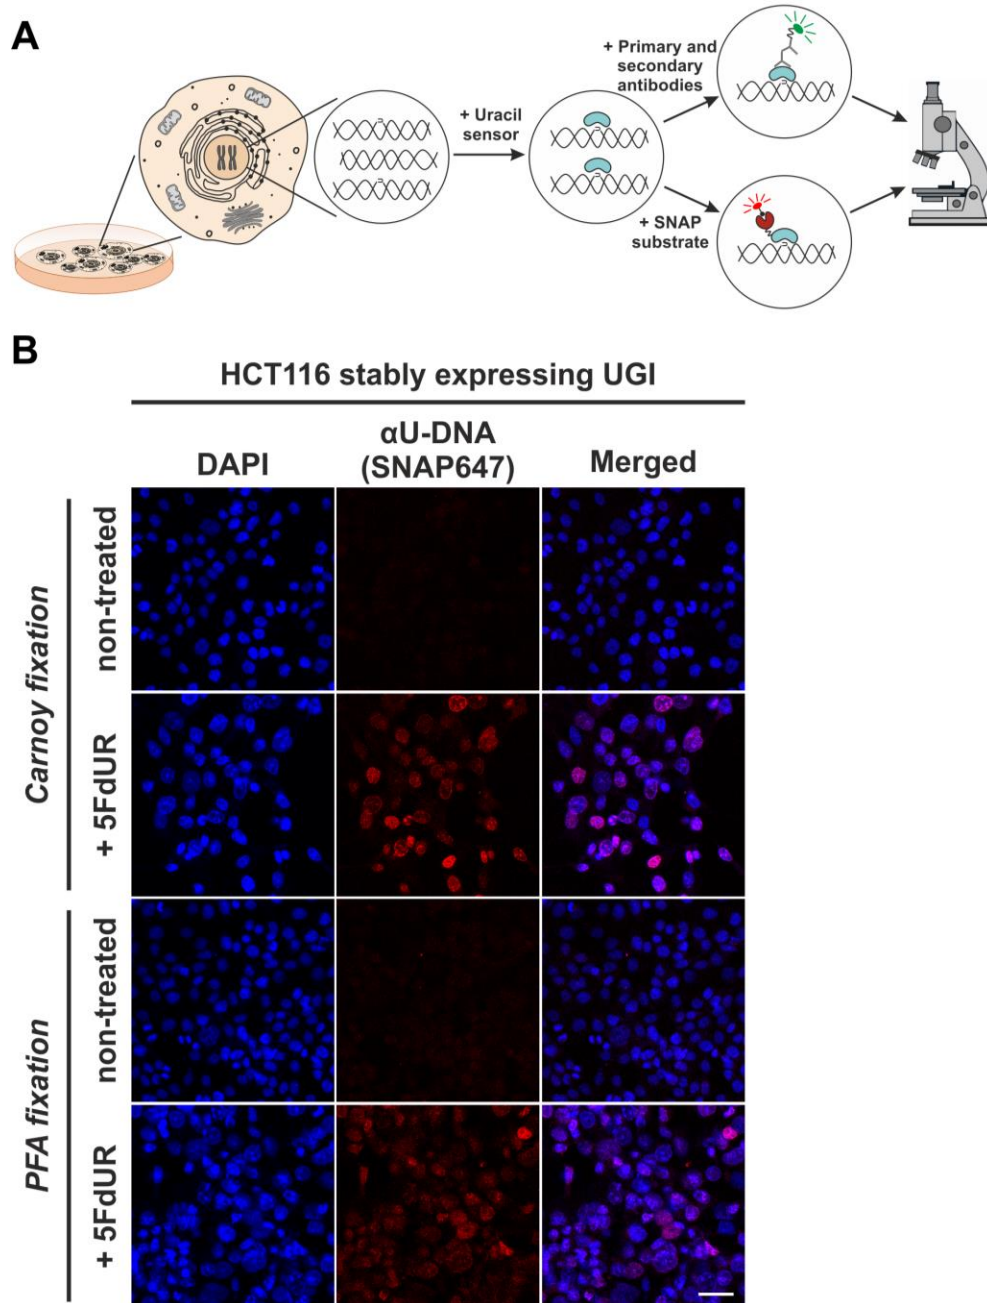

508

509

510 **Figure 5. *In situ* detection of the cellular endogenous U-DNA content.** (A) Scheme represents that  
511 genomic uracil residues can be visualized *in situ* using our further developed U-DNA sensor construct via  
512 immunocytochemistry (through FLAG-tag) or directly via SNAP-tag chemistry. (B) HCT116 cells expressing  
513 UGI and treated with 5FdUR show efficient staining with the uracil sensor compared to non-treated cells.  
514 Uracil residues are labelled by our FLAG- $\Delta$ UNG-SNAP sensor protein visualized by the SNAP647  
515 substrate. DAPI was used for DNA counterstaining. Our optimized staining method is capable of  
516 comparable, specific uracil detection in HCT116 cells even with PFA fixation compared to the Carnoy  
517 fixation applied previously (Róna et al., 2016). Scale bar represents 40  $\mu$ m. Note that the nuclei of the  
518 treated cells (5FdUR\_UGI) are enlarged as compared to the non-treated ones (NT\_UGI) presumably due  
519 to cell cycle arrest (Huehls et al., 2016; Yan et al., 2016).  
520



521 Our goal was to use this new sensor to detect *in situ* endogenous uracils in human cells in a setup that also  
522 allows colocalization with other chromatin factors. For visualization of our sensor, photostable SNAP-tag  
523 substrates (here SNAP647 or SNAP546) were used. Figure 5B shows that drug treatment and the inhibition  
524 of cellular UNG enzyme by UGI leads to significantly increased uracil content in genomic DNA that is readily  
525 observable on conventional confocal microscopic images. Figure 5B also demonstrates that our FLAG-  
526  $\Delta$ UNG-SNAP sensor can be applied for straightforward staining of genomic uracil after either Carnoy (as  
527 used previously (Róna et al., 2016)) or PFA fixation. Unlike Carnoy, PFA fixative is compatible with most  
528 antibody-based staining procedures, thus it is suitable for multi-colour imaging allowing colocalization  
529 studies. Next, we attempted to use super-resolution microscopy to have a better track of the uracil  
530 distribution pattern even in case of the low genomic uracil level found in the non-treated cells. Figure 6  
531 compares confocal, STED and dSTORM microscopy techniques for U-DNA detection. The exquisite  
532 sensitivity of dSTORM is apparent from these experiments as it can detect the low level of genomic uracil  
533 in non-treated cells (cf. Figure 6B). Importantly, we observed different heterogeneous staining in the  
534 nucleus for uracil in non-treated and drug-treated cells. Furthermore, images of drug-treated cells show  
535 uracil staining with signal enrichment at the nuclear membrane and areas surrounding the nucleoli.  
536 Supplementary Movies SM1-SM4 (also Supplementary Figure S9) contribute to further visualization of  
537 uracil distribution captured by confocal and STED imaging.

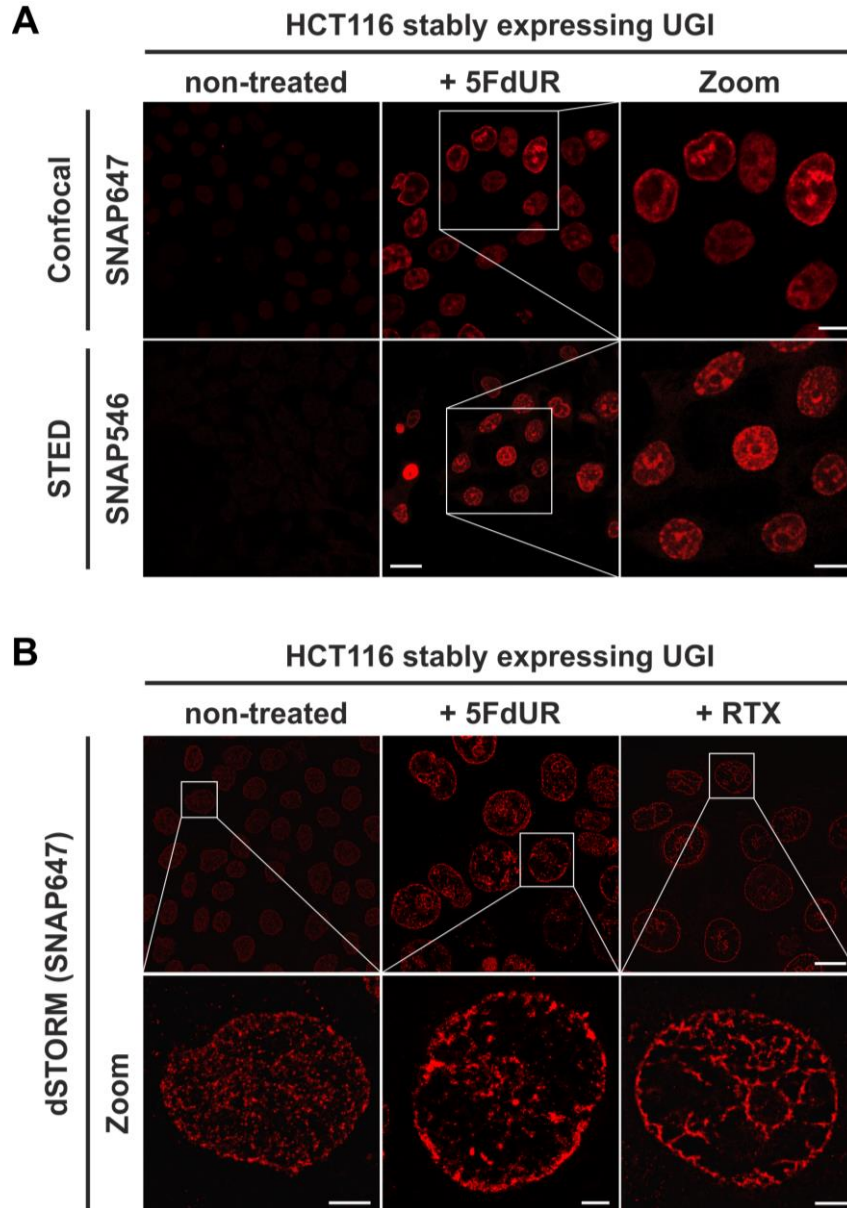

538

539

540 **Figure 6. The FLAG- $\Delta$ UNG-SNAP sensor enables super-resolution detection of genomic uracil by**  
541 **STED and dSTORM microscopy. (A)** U-DNA staining was performed on non-treated or 5FdUR treated  
542 HCT116 cells stably expressing UGI. Different SNAP-tag substrates, SNAP647 for confocal and SNAP546  
543 for super-resolution imaging (STED) were used to label FLAG- $\Delta$ UNG-SNAP. Scale bar represents 20  $\mu$ m  
544 for whole images and 10  $\mu$ m for zoomed sections. **(B)** dSTORM imaging was also performed on non-treated  
545 or drug-treated (5FdUR or RTX) HCT116 cells stably expressing UGI to compare the sensitivity of these  
546 imaging techniques. U-DNA staining shows a characteristic distribution pattern in cells with elevated uracil  
547 levels as compared to non-treated cells. SNAP647 substrate was used to label FLAG- $\Delta$ UNG-SNAP. Scale  
548 bar represents 10  $\mu$ m for whole images and 2  $\mu$ m for zoomed sections.  
549

550 Based on the genome-wide sequencing data analysis, we proceeded to select cognate chromatin markers  
551 for colocalization studies. As shown in Figure 4A, the highest similarity (GIGGLE) score corresponded to

552 H3K36me3 and H3K27me3 for the RTX and 5FdUR treated samples, respectively. Also, both of these  
553 chromatin markers showed positive correlation with each drug-treated, while negative correlation with each  
554 non-treated sample. Using the herein demonstrated immunofluorescence protocol we obtained co-stained  
555 images of uracil and these histone markers by both confocal and dSTORM microscopies (Figure 7A-B).  
556 Validating U-DNA-Seq data, we found that U-DNA staining shows significant colocalization with staining for  
557 both chromatin markers; H3K36me3 and H3K27me3, based on cross-pair correlation analysis of the super-  
558 resolution images as shown in Figure 7C-D. The rate of colocalization, as determined by the interaction  
559 factor (IF) value (Bermudez-Hernandez et al., 2017; Whelan et al., 2018), was statistically significant  
560 between the uracil signal and both chromatin markers in each case of drug treatment, when compared to  
561 the non-treated sample as well as to a generated set of random distribution patterns of these chromatin  
562 markers.

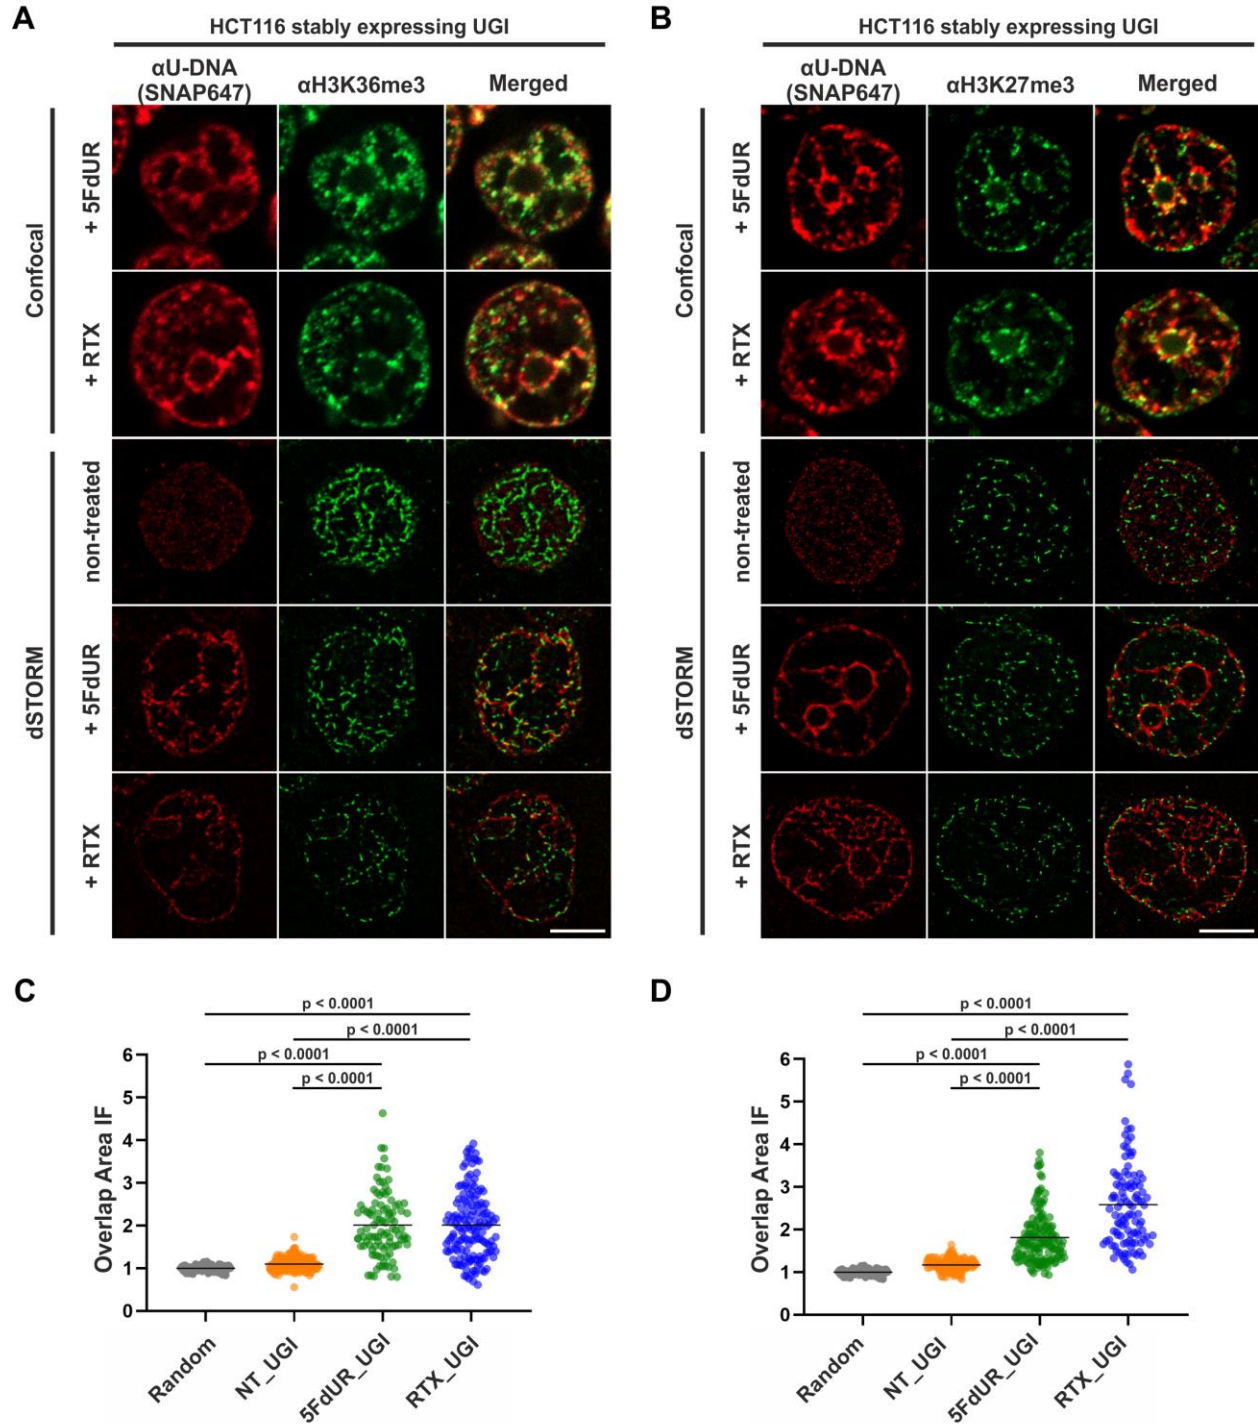

563

564 **Figure 7. Genomic uracil moieties colocalize with H3K36me3 and H3K27me3 analysed by super-**  
 565 **resolution microscopy.** Confocal and dSTORM imaging were performed on non-treated, 5FdUR or RTX  
 566 treated HCT116 cells stably expressing UGI to compare the localization of genomic uracil residues (red) to  
 567 histone markers, H3K36me3 (green) (A) or H3K27me3 (green) (B), selected based on the U-DNA-Seq  
 568 results. Scale bar represents 5  $\mu$ m. The graphs display the Cross-Pair-Correlation analysis between U-DNA  
 569 and H3K36me3 (C) or H3K27me3 (D), respectively. Overlap is defined as any amount of pixel overlap  
 570 between segmented objects. Total number of analysed nuclei for H3K36me3 staining (C) were the

571 following: NT\_UGI (n=205), 5FdUR\_UGI (n=101) and RTX\_UGI (n=153) from 2 independent experiments.  
572 Total number of analysed nuclei for H3K27me3 staining (**D**) were the following: NT\_UGI (n=154),  
573 5FdUR\_UGI (n=151) and RTX\_UGI (n=107) from 2 independent experiments. Black line denotes the mean  
574 of each dataset. The colour code follows the one in Figure 3A.  
575

## 576 DISCUSSION

577 We present here the U-DNA-Seq method that can provide genome-wide uracil distribution data. Such  
578 information is highly beneficial as the global U-DNA quantification method published thus far  
579 (Galashevskaya et al., 2013) cannot address the genome-wide localization of uracils. U-DNA-Seq is a  
580 direct, feasible alternative to the recently published UPD-seq (Sakhtemani et al., 2019), Excision-  
581 seq (Bryan et al., 2014) or dU-seq (Shu et al., 2018) methods, all of which allows only indirect detection  
582 requiring one or more auxiliary chemical or enzymatic step(s). Only these three methods have the potential  
583 thus far to map genome-wide distribution of uracil within isolated genomic DNA based on NGS, and only  
584 dU-seq was used in the context of human genome. Each of these three methods has advantages and also  
585 limitations. UPD-Seq detects abasic (AP) sites that can be generated from numerous base alterations  
586 through the dedicated DNA glycosylase enzymes. dU-seq follows a complex workflow on isolated genomic  
587 DNA that results in replacement of deoxyuridines with biotinylated nucleotides that is pulled down using  
588 streptavidin beads and is subjected to sequencing (Shu et al., 2018). While dU-seq and also Excision-seq  
589 rely on multiple enzymatic reactions initiated by UNG, U-DNA-Seq is a direct and less labour-intensive  
590 method employing U-DNA specific binding of catalytically inactive UNG-derived sensor constructs. Both  
591 dU-seq and U-DNA-Seq involve enrichment of uracil containing DNA fragments that increase sensitivity,  
592 while Excision-seq does not apply enrichment and relies on differential ligation of fragments excised through  
593 base excision repair. Excision-seq and UPD-seq were reported as adequate methods for efficient detection  
594 of elevated uracil levels in smaller genome sizes as in mutant *Escherichia coli* (*E. coli*) and yeast strains.  
595 The Excision-seq experiment suggested correlation between uracil accumulation and replication  
596 timing (Bryan et al., 2014). Nevertheless, the large mammalian genome size and the low frequency and/or  
597 nature of the distribution of uracils might result in some biases or underestimation using Excision-seq  
598 method.

599 Notably, dU-seq and Excision-seq are potentially capable to identify the exact position of individual uracils,  
600 providing single-base resolution. Considering the basically stochastic nature of uracil incorporation during  
601 DNA synthesis due to insensitivity of the polymerases, and spontaneous cytosine deamination, this aspect  
602 has lower impact. Due to the stochastic processes, the actual positions of uracil are expected to be variable  
603 in every single cell. Therefore, a statistical approach has higher descriptive value about the uracil  
604 distribution.

605 In addition, the usual analysis methods designed for ChIP-seq experiment were proved to be suboptimal.  
606 We therefore constructed a novel computational pipeline that allows reliable data analysis avoiding  
607 overinterpretation. Re-analysis of the earlier published dU-seq data with the herein developed pipeline (cf.  
608 Supplementary Table S5), showed very high correlation with our U-DNA-Seq data in case of comparable  
609 samples (non-treated K562 cells in both cases; and 5FdUR-treated UGI expressing HCT116 vs 5FdUR  
610 treated UNG<sup>-/-</sup> HEK293T cells, cf. Supplementary Figure S10) confirming robustness and reliability of our  
611 method. However, our interpretation is markedly different regarding the preferential centromeric location of



612 uracils that has been suggested by *Shu et al* (Shu et al., 2018). We argue that based on short-read  
613 sequencing data, centromeres cannot be assessed, thereby, the proposed centromeric uracil enrichment  
614 cannot be confirmed by dU-seq (see detailed argumentation in Supplementary Material, Supplementary  
615 Figure S11).

616 Using U-DNA-Seq, here we demonstrate that distribution of uracil-containing regions is altered in the drug-  
617 treated (5FdUR or RTX, in combination with UGI) as compared to the non-treated (wild type and UGI  
618 expressing) samples. The genomic uracil distribution patterns either in non-treated and in drug-treated cells  
619 are found to be non-random: broad regions of uracil enriched genomic segments were detected. Within the  
620 third part of our pipeline (cf. Figure 2, and Supplementary Figure 2), we also analysed the distribution  
621 pattern of these broad peaks comparing them to a set of relevant and cell type specific data of ChIP-seq  
622 experiments and other genomic features. In drug-treated cells, these broad segments showed highest  
623 correlation with ChIP-seq-based patterns published for predominantly euchromatin and facultative  
624 heterochromatin markers (Figure 4). Increasing evidence suggests that active and repressed chromatin  
625 states can be determined in a combinatorial fashion where simultaneous histone marks can efficiently shift  
626 gene expression from inactive to active states or vice versa (Gates et al., 2017; Hyun et al., 2017). Hence,  
627 it is of special interest to note that our colocalization data show similarity scores not just for one but for a  
628 variety of factors. Importantly, regarding these factors and additional features, our results are highly  
629 coherent. Namely, the outstanding correlation of uracil-DNA patterns in drug-treated samples with active  
630 promoters, CpG islands, early replicating segments and DNase hypersensitive sites, highly supports the  
631 above conclusion. Euchromatin was shown to imply early replicating genomic regions, whereas  
632 heterochromatin replicates in late S-phase (Black, Van Rechem, & Whetstine, 2012). Accordingly, we  
633 report that the drug treatment induced U-DNA pattern is more similar to the early replicating segments,  
634 whereas U-DNA distribution in non-treated (wild type and UGI-expressing) cells shows simultaneous  
635 association with both heterochromatin markers and late replicating regions (Figure 4B-C).

636 Consistently with our observations, *Weeks et al* very recently showed that treatment with the antifolate  
637 pemetrexed in UNG <sup>-/-</sup> human colon cancer cells led to preferential enrichment of double-strand breaks  
638 (DSBs) within highly accessible euchromatic regions, like transcription factor binding sites, origins of  
639 replication, DNase hypersensitivity regions and CpG islands (Weeks, Zentner, Scacheri, & Gerson, 2014).  
640 This study did not directly address the occurrence of uracil moieties but caught the process initiated by  
641 uracil incorporation at a later stage. Still, the distribution pattern of the resulting DSBs showed similarities  
642 to our U-DNA-Seq data.

643 Taken together, in the non-treated cells, where the level of genomic uracil is low, we show that it is  
644 preferentially located in the constitutive heterochromatin, which can be explained by the fact that  
645 heterochromatin is generally highly condensed and thus less accessible for DNA repair and replicative DNA  
646 synthesis. In contrast, in the open, more frequently transcribed euchromatin, DNA repair can efficiently  
647 correct uracils in the presence of a balanced dNTP pool. The low amount of genomic uracil in non-treated

648 cells might remain from either cytosine deamination or thymine replacing misincorporation that escaped  
649 DNA repair. However, drug (5FdUR or RTX) treatment perturbs the cellular nucleotide pool, and  
650 consequently highly increase the rate of thymine replacing uracil misincorporation events overwriting the  
651 background uracil pattern of non-treated cells' genome. Uracil appearance via thymine replacing  
652 misincorporation implies prior DNA synthesis involved in either replication, transcription-coupled DNA repair  
653 or epigenetic reprogramming (e. g. erasing the methyl-cytosine epigenetic mark). Importantly, we found that  
654 uracil pattern showed the highest correlation with the features (early replication, active promoters and  
655 DNase hypersensitive sites, and CpG islands) linked exactly to these processes (cf. Figure 4B).

656 The antifolate or nucleotide-based thymidylate synthase inhibitors, such as 5-FU, RTX or 5FdUR are known  
657 to lead to cell-cycle arrest, as it is reflected in the detected uracil-DNA pattern that strongly correlates with  
658 the early replicating segments in case of both drug treatments. The two drugs caused similar, but not  
659 equivalent uracil-DNA pattern. On the one hand, the correlation with the H3K36me3 marker as well as with  
660 the early replicating segments are both markedly stronger with the RTX treated sample as compared to the  
661 5FdUR treated sample (cf. Figure 4). On the other hand, the correlation of uracil accumulation with the  
662 H3K27me3 marker, and with the CpG islands is stronger in the 5FdUR treated sample. Such differences  
663 might correspond to drug-specific mechanism of action, involving alterations in signalling processes,  
664 transcription regulation and the timing of cell-cycle arrest (Van Triest, Pinedo, Giaccone, & Peters, 2000).  
665 Details of these mechanisms remain obscure in the literature. Still, it is well-known that both drugs inhibit  
666 thymidylate synthase thereby facilitating dUTP incorporation into DNA, while the nucleotide analogue  
667 5FdUR also leads to direct incorporation of 5-fluorodeoxyuridine triphosphate (FdUTP) into the DNA  
668 (Longley, Harkin, & Johnston, 2003; Pettersen et al., 2011). Genomic uracil and fluorouracil (FU) might  
669 have different effects on transcription and epigenetic regulation processes that might also contribute to the  
670 observed differences of the two U-DNA patterns. It should be noted that our method detects both uracil and  
671 also FU within the DNA, since the UNG enzyme also binds to FU (Pettersen et al., 2011). Phenotypic  
672 differences in cell-cycle progression upon the two drug treatments were also reported. The 5FdUR  
673 treatment was shown to cause an S-phase arrest in the second cycle (Huehls et al., 2016; Yan et al., 2016),  
674 while the actual time point of cell-cycle arrest upon RTX treatment is still controversial (Blackledge, 1998;  
675 Ding et al., 2019; Zhao, Zhang, Sun, Zhan, & Zhao, 2016).

676 The new U-DNA-Seq method was shown to be reliable, robust and potent enough to gain systematic  
677 information on uracil-DNA metabolism upon drug treatments. Such information could essentially contribute  
678 to the future understanding of the mechanistic details either of cytotoxic effect induced by anti-cancer drugs,  
679 or other biological processes involving genomic uracil appearance. To this end, it is also of key importance  
680 to establish new visualization methods allowing colocalization measurements between U-DNA and other  
681 factors in highly complex eukaryotic cells.

682 Therefore, we further developed the U-DNA sensor to visualize genomic uracil *in situ* in human cells. The  
683 FLAG-ΔUNG-SNAP sensor construct and the optimized staining method presented here were successfully

684 applied in confocal and super-resolution (STED or dSTORM) microscopies (see Figures 5-7). To our  
685 knowledge, there is no alternative technique published so far for *in situ* microscopic detection of mammalian  
686 genomic uracil. A recent paper was published reporting a similar approach, where uracil-DNA glycosylase  
687 UdgX was coupled to a fluorescent tag and applied for staining of uracils in *E. coli* DNA (Datta et al., 2019),  
688 however, in our previous study  $\Delta$ UNG had already been proved to be potent for *in situ* uracil detection in  
689 the same organism (Róna et al., 2016). Still, the UdgX-based tool was not further extended for detection of  
690 uracils within the highly complex chromatin of human cells. Moreover, our detection method also allows  
691 simultaneous staining for other factors in colocalization experiments, potentially providing mechanistic  
692 insight of several important biological phenomena that involves uracil-DNA. In the present study, two  
693 histone markers were selected based on the U-DNA-Seq results for colocalization studies. Using dSTORM  
694 super-resolution microscopy we could confirm the statistically significant correlation of genomic uracil with  
695 the two selected histone markers (H3K36me3 and H3K27me3) in drug-treated (5FdUR or RTX), UGI-  
696 expressing cells (Figure 7). The H3K36me3 was shown to associate with actively transcribed genes  
697 (Becker et al., 2017; Hyun et al., 2017; Pfister et al., 2014), while H3K27me3 is the most cited marker for  
698 facultative heterochromatin (Becker et al., 2017; Saksouk et al., 2015). In summary, co-staining of genomic  
699 uracil in drug-treated cells and the selected histone markers via dSTORM reinforced the association  
700 between uracil occurrence and transcriptionally active regions.

701 It has been argued that uracil accumulation may play a more decisive role in genomic instability than the  
702 induced uracil-excision repair (Huehls et al., 2016; Yan et al., 2016). Uracil in DNA may therefore be used  
703 as a key marker for efficiency of chemotherapeutic drugs targeting thymidylate biosynthesis. Our presently  
704 developed techniques to follow the extent and pattern of uracilation induced by several chemotherapeutic  
705 drugs may provide key novel insights into the mechanism of drug action.

706

707

708 **DATA AVAILABILITY**

709 Sequencing data have been deposited into the Gene Expression Omnibus (GEO) under accession number  
710 GSE126822.

711

712 **SUPPLEMENTARY DATA**

713 Supplementary Data are also available.

714

715 **FUNDING**

716 Supported by the National Research, Development and Innovation Office of Hungary (K119493, NVKP\_16-  
717 1-2016-0020, 2017-1.3.1-VKE-2017-00002, 2017-1.3.1-VKE-2017-00013, VEKOP-2.3.2-16-2017-00013,  
718 NKP-2018-1.2.1-NKP-2018-00005 to BGV, NVKP\_16-1-2016-0037, 2018-1.3.1-VKE-2018-00032, KH-  
719 129581 to BG,) and the BME-Biotechnology FIKP grant of EMMI (BME FIKP-BIO). CG was supported by  
720 Cancer Research UK grant C37/A18784. MP was funded by grants from the National Institutes of Health.  
721 MP is an Investigator with the Howard Hughes Medical Institute.

722

723 **CONFLICT OF INTEREST**

724 M.P. is a member of the scientific advisory boards of CullGen Inc. and Kymera Therapeutics, and a  
725 consultant for BeyondSpring Pharmaceutical.

726

727 **ACKNOWLEDGEMENTS**

728 We gratefully acknowledged the kind help of György Török and László Homolya in acquiring fluorescent  
729 images via STED microscopy. We also wish to say sincere thanks to György Várady in FACS sorting  
730 experiments, and to Gábor Tusnányi for providing access to computational capacity. We acknowledge the  
731 ENCODE Consortium (ENCODE Project Consortium, 2012) and the ENCODE production laboratory(s)  
732 generating the particular dataset(s) as well as the contributors of the UCSC Table Browser (Karolchik et  
733 al., 2004; Kuhn, Haussler, & Kent, 2013) data. We also acknowledge the contributors of Ensembl (Zerbino  
734 et al., 2018), ReplicationDomain (Weddington et al., 2008), Cistrome Data Browser (Mei et al., 2017) for  
735 making their data publicly available.

736 **REFERENCES**

- 737 Becker, J. S., McCarthy, R. L., Sidoli, S., Donahue, G., Kaeding, K. E., He, Z., ... Zaret, K. S. (2017).  
738 Genomic and Proteomic Resolution of Heterochromatin and Its Restriction of Alternate Fate Genes.  
739 *Molecular Cell*, 68(6), 1023–1037.e15. <http://doi.org/10.1016/j.molcel.2017.11.030>
- 740 Bermudez-Hernandez, K., Keegan, S., Whelan, D. R., Reid, D. A., Zagelbaum, J., Yin, Y., ... Fenyő, D.  
741 (2017). A Method for Quantifying Molecular Interactions Using Stochastic Modelling and Super-  
742 Resolution Microscopy. *Scientific Reports*, 7(1), 1–13. <http://doi.org/10.1038/s41598-017-14922-8>
- 743 Black, J. C., Van Rechem, C., & Whetstine, J. R. (2012). Histone lysine methylation dynamics:  
744 establishment, regulation, and biological impact. *Molecular Cell*, 48(4), 491–507.  
745 <http://doi.org/10.1016/j.molcel.2012.11.006>
- 746 Blackledge, G. (1998). New developments in cancer treatment with the novel thymidylate synthase  
747 inhibitor raltitrexed ('Tomudex'). *British Journal of Cancer*, 77 Suppl 2, 29–37. Retrieved from  
748 [http://www.pubmedcentral.nih.gov/articlerender.fcgi?artid=2149719&tool=pmcentrez&rendertype=ab](http://www.pubmedcentral.nih.gov/articlerender.fcgi?artid=2149719&tool=pmcentrez&rendertype=abstract)  
749 [stract](http://www.pubmedcentral.nih.gov/articlerender.fcgi?artid=2149719&tool=pmcentrez&rendertype=abstract)
- 750 Boissinot, S., & Furano, A. V. (2005). The recent evolution of human L1 retrotransposons. *Cytogenetic*  
751 *and Genome Research*, 110(1–4), 402–6. <http://doi.org/10.1159/000084972>
- 752 Bryan, D. S., Ransom, M., Adane, B., York, K., & Hesselberth, J. R. (2014). High resolution mapping of  
753 modified DNA nucleobases using excision repair enzymes. *Genome Research*, 24(9), 1534–1542.  
754 <http://doi.org/10.1101/gr.174052.114>
- 755 Burns, M. B., Leonard, B., & Harris, R. S. (2015). APOBEC3B: pathological consequences of an innate  
756 immune DNA mutator. *Biomedical Journal*, 38(2), 102–10. <http://doi.org/10.4103/2319-4170.148904>
- 757 Creighton, M. P., Cheng, A. W., Welstead, G. G., Kooistra, T., Carey, B. W., Steine, E. J., ... Jaenisch,  
758 R. (2010). Histone H3K27ac separates active from poised enhancers and predicts developmental  
759 state. *Proceedings of the National Academy of Sciences of the United States of America*, 107(50),  
760 21931–6. <http://doi.org/10.1073/pnas.1016071107>
- 761 Datta, M., Aroli, S., Karmakar, K., Dutta, S., Chakravorty, D., & Varshney, U. (2019). Development of  
762 mCherry tagged UdgX as a highly sensitive molecular probe for specific detection of uracils in DNA.  
763 *Biochemical and Biophysical Research Communications*, 518(1), 38–43.  
764 <http://doi.org/10.1016/j.bbrc.2019.08.005>
- 765 Ding, W.-X., Liu, S., Ma, J.-X., Pu, J., Wang, H.-J., Zhang, S., & Sun, X.-C. (2019). Raltitrexed increases  
766 radiation sensitivity of esophageal squamous carcinoma cells. *Cancer Cell International*, 19(1), 36.  
767 <http://doi.org/10.1186/s12935-019-0752-y>
- 768 Doetzlhofer, A., Rotheneder, H., Lagger, G., Koranda, M., Kurtev, V., Brosch, G., ... Seiser, C. (1999).  
769 Histone deacetylase 1 can repress transcription by binding to Sp1. *Molecular and Cellular Biology*,  
770 19(8), 5504–11. <http://doi.org/10.1128/mcb.19.8.5504>
- 771 ENCODE Project Consortium. (2012). An integrated encyclopedia of DNA elements in the human  
772 genome. *Nature*, 489(7414), 57–74. <http://doi.org/10.1038/nature11247>
- 773 Galashevskaya, A., Sarno, A., Vågbo, C. B., Aas, P. A., Hagen, L., Slupphaug, G., & Krokan, H. E.  
774 (2013). A robust, sensitive assay for genomic uracil determination by LC/MS/MS reveals lower  
775 levels than previously reported. *DNA Repair*, 12(9), 699–706.  
776 <http://doi.org/10.1016/j.dnarep.2013.05.002>
- 777 Gates, L. A., Shi, J., Rohira, A. D., Feng, Q., Zhu, B., Bedford, M. T., ... O'Malley, B. W. (2017).  
778 Acetylation on histone H3 lysine 9 mediates a switch from transcription initiation to elongation. *The*  
779 *Journal of Biological Chemistry*, 292(35), 14456–14472. <http://doi.org/10.1074/jbc.M117.802074>

- 780 Giaimo, B. D., Ferrante, F., Herchenröther, A., Hake, S. B., & Borggrefe, T. (2019). The histone variant  
781 H2A.Z in gene regulation. *Epigenetics & Chromatin*, *12*(1), 37. [http://doi.org/10.1186/s13072-019-](http://doi.org/10.1186/s13072-019-0274-9)  
782 0274-9
- 783 Gilbert, D. M. (2002). Replication timing and transcriptional control: beyond cause and effect. *Current*  
784 *Opinion in Cell Biology*, *14*(3), 377–83. [http://doi.org/10.1016/s0955-0674\(02\)00326-5](http://doi.org/10.1016/s0955-0674(02)00326-5)
- 785 Holmquist, G., Gray, M., Porter, T., & Jordan, J. (1982). Characterization of Giemsa dark- and light-band  
786 DNA. *Cell*, *31*(1), 121–9. [http://doi.org/10.1016/0092-8674\(82\)90411-1](http://doi.org/10.1016/0092-8674(82)90411-1)
- 787 Horváth, A., Békési, A., Muha, V., Erdélyi, M., & Vértessy, B. G. (2013). Expanding the DNA alphabet in  
788 the fruit fly: uracil enrichment in genomic DNA. *Fly*, *7*(1), 23–7. <http://doi.org/10.4161/fly.23192>
- 789 Horváth, A., & Vértessy, B. G. (2010). A one-step method for quantitative determination of uracil in DNA  
790 by real-time PCR. *Nucleic Acids Research*, *38*(21), e196. <http://doi.org/10.1093/nar/gkq815>
- 791 Huehls, A. M., Huntoon, C. J., Joshi, P. M., Baehr, C. A., Wagner, J. M., Wang, X., ... Karnitz, L. M.  
792 (2016). Genomically Incorporated 5-Fluorouracil that Escapes UNG-Initiated Base Excision Repair  
793 Blocks DNA Replication and Activates Homologous Recombination. *Molecular Pharmacology*,  
794 *89*(1), 53–62. <http://doi.org/10.1124/mol.115.100164>
- 795 Hyun, K., Jeon, J., Park, K., & Kim, J. (2017). Writing, erasing and reading histone lysine methylations.  
796 *Experimental and Molecular Medicine*, *49*(4), e324-22. <http://doi.org/10.1038/emm.2017.11>
- 797 Jensen, M. A., Ferretti, V., Grossman, R. L., & Staudt, L. M. (2017). The NCI Genomic Data Commons as  
798 an engine for precision medicine. *Blood*, *130*(4), 453–459. [http://doi.org/10.1182/blood-2017-03-](http://doi.org/10.1182/blood-2017-03-735654)  
799 735654
- 800 Karolchik, D., Hinrichs, A. S., Furey, T. S., Roskin, K. M., Sugnet, C. W., Haussler, D., & Kent, W. J.  
801 (2004). The UCSC Table Browser data retrieval tool. *Nucleic Acids Research*, *32*(90001), 493D–  
802 496. <http://doi.org/10.1093/nar/gkh103>
- 803 Kavli, B., Sundheim, O., Akbari, M., Otterlei, M., Nilsen, H., Skorpen, F., ... Slupphaug, G. (2002). hUNG2  
804 is the major repair enzyme for removal of uracil from U:A matches, U:G mismatches, and U in  
805 single-stranded DNA, with hSMUG1 as a broad specificity backup. *The Journal of Biological*  
806 *Chemistry*, *277*(42), 39926–36. <http://doi.org/10.1074/jbc.M207107200>
- 807 Keppler, A., Gendreizig, S., Gronemeyer, T., Pick, H., Vogel, H., & Johnsson, K. (2003). A general  
808 method for the covalent labeling of fusion proteins with small molecules in vivo. *Nature*  
809 *Biotechnology*, *21*(1), 86–89. <http://doi.org/10.1038/nbt765>
- 810 Khodursky, A., Guzmán, E. C., & Hanawalt, P. C. (2015). Thymineless Death Lives On: New Insights into  
811 a Classic Phenomenon. *Annual Review of Microbiology*, *69*(1), 247–263.  
812 <http://doi.org/10.1146/annurev-micro-092412-155749>
- 813 Kovalskaya, E., Buzdin, A., Gogvadze, E., Vinogradova, T., & Sverdlov, E. (2006). Functional human  
814 endogenous retroviral LTR transcription start sites are located between the R and U5 regions.  
815 *Virology*, *346*(2), 373–8. <http://doi.org/10.1016/j.virol.2005.11.007>
- 816 Kramerov, D. A., & Vassetzky, N. S. (2005). Short retroposons in eukaryotic genomes. *International*  
817 *Review of Cytology*, *247*(05), 165–221. [http://doi.org/10.1016/S0074-7696\(05\)47004-7](http://doi.org/10.1016/S0074-7696(05)47004-7)
- 818 Krokan, H. E., & Bjørås, M. (2013). Base excision repair. *Cold Spring Harbor Perspectives in Biology*,  
819 *5*(4), a012583. <http://doi.org/10.1101/cshperspect.a012583>
- 820 Krokan, H. E., Drabløs, F., & Slupphaug, G. (2002). Uracil in DNA--occurrence, consequences and repair.  
821 *Oncogene*, *21*(58), 8935–48. <http://doi.org/10.1038/sj.onc.1205996>



- 822 Kuhn, R. M., Haussler, D., & Kent, W. J. (2013). The UCSC genome browser and associated tools.  
823 *Briefings in Bioinformatics*, 14(2), 144–161. <http://doi.org/10.1093/bib/bbs038>
- 824 Layer, R. M., Pedersen, B. S., DiSera, T., Marth, G. T., Gertz, J., & Quinlan, A. R. (2018). GIGGLE: a  
825 search engine for large-scale integrated genome analysis. *Nature Methods*, 15(2), 123–126.  
826 <http://doi.org/10.1038/nmeth.4556>
- 827 Li, H., & Durbin, R. (2010). Fast and accurate long-read alignment with Burrows-Wheeler transform.  
828 *Bioinformatics*, 26(5), 589–595. <http://doi.org/10.1093/bioinformatics/btp698>
- 829 Li, H., Handsaker, B., Wysoker, A., Fennell, T., Ruan, J., Homer, N., ... Durbin, R. (2009). The Sequence  
830 Alignment/Map format and SAMtools. *Bioinformatics*, 25(16), 2078–2079.  
831 <http://doi.org/10.1093/bioinformatics/btp352>
- 832 Liu, M., & Schatz, D. G. (2009). Balancing AID and DNA repair during somatic hypermutation. *Trends in*  
833 *Immunology*, 30(4), 173–81. <http://doi.org/10.1016/j.it.2009.01.007>
- 834 Longley, D. B., Harkin, D. P., & Johnston, P. G. (2003). 5-fluorouracil: mechanisms of action and clinical  
835 strategies. *Nature Reviews. Cancer*, 3(5), 330–8. <http://doi.org/10.1038/nrc1074>
- 836 López-Flores, I., & Garrido-Ramos, M. A. (2012). The repetitive DNA content of eukaryotic genomes.  
837 *Genome Dynamics*, 7, 1–28. <http://doi.org/10.1159/000337118>
- 838 Luo, Y., Walla, M., & Wyatt, M. D. (2008). Uracil incorporation into genomic DNA does not predict toxicity  
839 caused by chemotherapeutic inhibition of thymidylate synthase. *DNA Repair*, 7(2), 162–9.  
840 <http://doi.org/10.1016/j.dnarep.2007.09.001>
- 841 Maul, R. W., & Gearhart, P. J. (2010). AID and somatic hypermutation. *Advances in Immunology*, 105,  
842 159–91. [http://doi.org/10.1016/S0065-2776\(10\)05006-6](http://doi.org/10.1016/S0065-2776(10)05006-6)
- 843 Maul, R. W., & Gearhart, P. J. (2014). Refining the Neuberger model: Uracil processing by activated B  
844 cells. *European Journal of Immunology*, 44(7), 1913–6. <http://doi.org/10.1002/eji.201444813>
- 845 Mei, S., Qin, Q., Wu, Q., Sun, H., Zheng, R., Zang, C., ... Liu, X. S. (2017). Cistrome Data Browser: a  
846 data portal for ChIP-Seq and chromatin accessibility data in human and mouse. *Nucleic Acids*  
847 *Research*, 45(D1), D658–D662. <http://doi.org/10.1093/nar/gkw983>
- 848 Molnár, P., Marton, L., Izrael, R., Pálkás, H. L., & Vértessy, B. G. (2018). Uracil moieties in Plasmodium  
849 falciparum genomic DNA. *FEBS Open Bio*, 8(11), 1763–1772. <http://doi.org/10.1002/2211-5463.12458>
- 851 Muha, V., Horváth, A., Békési, A., Pukáncsik, M., Hodoscsek, B., Merényi, G., ... Vértessy, B. G. (2012).  
852 Uracil-containing DNA in Drosophila: stability, stage-specific accumulation, and developmental  
853 involvement. *PLoS Genetics*, 8(6), e1002738. <http://doi.org/10.1371/journal.pgen.1002738>
- 854 Ostrer, L., Hamann, B. L., & Khodursky, A. (2015). Perturbed states of the bacterial chromosome: a  
855 thymineless death case study. *Frontiers in Microbiology*, 6, 363.  
856 <http://doi.org/10.3389/fmicb.2015.00363>
- 857 Pettersen, H. S., Visnes, T., Vågbo, C. B., Svaasand, E. K., Doseeth, B., Slupphaug, G., ... Krokan, H. E.  
858 (2011). UNG-initiated base excision repair is the major repair route for 5-fluorouracil in DNA, but 5-  
859 fluorouracil cytotoxicity depends mainly on RNA incorporation. *Nucleic Acids Research*, 39(19),  
860 8430–44. <http://doi.org/10.1093/nar/gkr563>
- 861 Pfister, S. X., Ahrabi, S., Zalmas, L.-P., Sarkar, S., Aymard, F., Bachrati, C. Z., ... Humphrey, T. C.  
862 (2014). SETD2-dependent histone H3K36 trimethylation is required for homologous recombination  
863 repair and genome stability. *Cell Reports*, 7(6), 2006–18. <http://doi.org/10.1016/j.celrep.2014.05.026>

- 864 Quinlan, A. R., & Hall, I. M. (2010). BEDTools: a flexible suite of utilities for comparing genomic features.  
865 *Bioinformatics*, 26(6), 841–842. <http://doi.org/10.1093/bioinformatics/btq033>
- 866 Ramírez, F., Ryan, D. P., Grüning, B., Bhardwaj, V., Kilpert, F., Richter, A. S., ... Manke, T. (2016).  
867 deepTools2: a next generation web server for deep-sequencing data analysis. *Nucleic Acids*  
868 *Research*, 44(W1), W160-5. <http://doi.org/10.1093/nar/gkw257>
- 869 Rona, G., Roberti, D., Yin, Y., Pagan, J. K., Homer, H., Sassani, E., ... Pagano, M. (2018). PARP1-  
870 dependent recruitment of the FBXL10-RNF68-RNF2 ubiquitin ligase to sites of DNA damage  
871 controls H2A.Z loading. *ELife*, 7, 1–31. <http://doi.org/10.7554/eLife.38771>
- 872 Róna, G., Scheer, I., Nagy, K., Pálincás, H. L., Tihanyi, G., Borsos, M., ... Vértessy, B. G. (2016).  
873 Detection of uracil within DNA using a sensitive labeling method for in vitro and cellular applications.  
874 *Nucleic Acids Research*, 44(3), e28. <http://doi.org/10.1093/nar/gkv977>
- 875 Sakhtemani, R., Senevirathne, V., Stewart, J., Perera, M. L. W., Pique-Regi, R., Lawrence, M. S., &  
876 Bhagwat, A. S. (2019). Genome-wide mapping of regions preferentially targeted by the human DNA-  
877 cytosine deaminase APOBEC3A using uracil-DNA pulldown and sequencing. *The Journal of*  
878 *Biological Chemistry*, (7), jbc.RA119.008053. <http://doi.org/10.1074/jbc.RA119.008053>
- 879 Saksouk, N., Simboeck, E., & Déjardin, J. (2015). Constitutive heterochromatin formation and  
880 transcription in mammals. *Epigenetics & Chromatin*, 8, 3. <http://doi.org/10.1186/1756-8935-8-3>
- 881 Shu, X., Liu, M., Lu, Z., Zhu, C., Meng, H., Huang, S., ... Yi, C. (2018). Genome-wide mapping reveals  
882 that deoxyuridine is enriched in the human centromeric DNA. *Nature Chemical Biology*, 14(7), 680–  
883 687. <http://doi.org/10.1038/s41589-018-0065-9>
- 884 Stenglein, M. D., Burns, M. B., Li, M., Lengyel, J., & Harris, R. S. (2010). APOBEC3 proteins mediate the  
885 clearance of foreign DNA from human cells. *Nature Structural & Molecular Biology*, 17(2), 222–229.  
886 <http://doi.org/10.1038/nsmb.1744>
- 887 Suspène, R., Henry, M., Guillot, S., Wain-Hobson, S., & Vartanian, J. P. (2005). Recovery of APOBEC3-  
888 edited human immunodeficiency virus G→A hypermutants by differential DNA denaturation PCR.  
889 *Journal of General Virology*, 86(1), 125–129. <http://doi.org/10.1099/vir.0.80426-0>
- 890 Thorvaldsdóttir, H., Robinson, J. T., & Mesirov, J. P. (2013). Integrative Genomics Viewer (IGV): High-  
891 performance genomics data visualization and exploration. *Briefings in Bioinformatics*, 14(2), 178–  
892 192. <http://doi.org/10.1093/bib/bbs017>
- 893 Van Triest, B., Pinedo, H. M., Giaccone, G., & Peters, G. J. (2000). Downstream molecular determinants  
894 of response to 5-fluorouracil and antifolate thymidylate synthase inhibitors. *Annals of Oncology* :  
895 *Official Journal of the European Society for Medical Oncology*, 11(4), 385–91.  
896 <http://doi.org/10.1023/a:1008351221345>
- 897 Vértessy, B. G., & Tóth, J. (2009). Keeping uracil out of DNA: physiological role, structure and catalytic  
898 mechanism of dUTPases. *Accounts of Chemical Research*, 42(1), 97–106.  
899 <http://doi.org/10.1021/ar800114w>
- 900 Visnes, T., Doseth, B., Pettersen, H. S., Hagen, L., Sousa, M. M. L., Akbari, M., ... Krokan, H. E. (2009).  
901 Uracil in DNA and its processing by different DNA glycosylases. *Philosophical Transactions of the*  
902 *Royal Society of London. Series B, Biological Sciences*, 364(1517), 563–8.  
903 <http://doi.org/10.1098/rstb.2008.0186>
- 904 Wallace, S. S. (2014). Base excision repair: a critical player in many games. *DNA Repair*, 19, 14–26.  
905 <http://doi.org/10.1016/j.dnarep.2014.03.030>
- 906 Weddington, N., Stuy, A., Hiratani, I., Ryba, T., Yokochi, T., & Gilbert, D. M. (2008). ReplicationDomain: a  
907 visualization tool and comparative database for genome-wide replication timing data. *BMC*

- 908 *Bioinformatics*, 9, 530. <http://doi.org/10.1186/1471-2105-9-530>
- 909 Weeks, L. D., Zentner, G. E., Scacheri, P. C., & Gerson, S. L. (2014). Uracil DNA glycosylase (UNG) loss  
910 enhances DNA double strand break formation in human cancer cells exposed to pemetrexed. *Cell*  
911 *Death & Disease*, 5(2), e1045. <http://doi.org/10.1038/cddis.2013.477>
- 912 Whelan, D. R., Lee, W. T. C., Yin, Y., Keegan, S., Fenyo, D., Rothenberg, E., ... Bermudez-hernandez, K.  
913 (2018). Spatiotemporal dynamics of homologous recombination repair at single collapsed replication  
914 forks. *Nature Communications*, 3882(9), 2041–1723. <http://doi.org/10.1038/s41467-018-06435-3>
- 915 Wilson, P. M., Danenberg, P. V., Johnston, P. G., Lenz, H.-J., & Ladner, R. D. (2014). Standing the test of  
916 time: targeting thymidylate biosynthesis in cancer therapy. *Nature Reviews. Clinical Oncology*,  
917 11(5), 282–98. <http://doi.org/10.1038/nrclinonc.2014.51>
- 918 Xu, Z., Zan, H., Pone, E. J., Mai, T., & Casali, P. (2012). Immunoglobulin class-switch DNA  
919 recombination: induction, targeting and beyond. *Nature Reviews Immunology*, 12(7), 517–531.  
920 <http://doi.org/10.1038/nri3216>
- 921 Yan, Y., Han, X., Qing, Y., Condie, A. G., Gorityala, S., Yang, S., ... Gerson, S. L. (2016). Inhibition of  
922 uracil DNA glycosylase sensitizes cancer cells to 5-fluorodeoxyuridine through replication fork  
923 collapse-induced DNA damage. *Oncotarget*, 7(37), 59299–59313.  
924 <http://doi.org/10.18632/oncotarget.11151>
- 925 Zerbino, D. R., Achuthan, P., Akanni, W., Amode, M. R., Barrell, D., Bhai, J., ... Flicek, P. (2018).  
926 Ensembl 2018. *Nucleic Acids Research*, 46(D1), D754–D761. <http://doi.org/10.1093/nar/gkx1098>
- 927 Zhang, Y., Liu, T., Meyer, C. A., Eeckhoute, J., Johnson, D. S., Bernstein, B. E., ... Liu, X. S. (2008).  
928 Model-based Analysis of ChIP-Seq (MACS). *Genome Biology*, 9(9), R137. [http://doi.org/10.1186/gb-](http://doi.org/10.1186/gb-2008-9-9-r137)  
929 [2008-9-9-r137](http://doi.org/10.1186/gb-2008-9-9-r137)
- 930 Zhao, H., Zhang, Y., Sun, J., Zhan, C., & Zhao, L. (2016). Raltitrexed Inhibits HepG2 Cell Proliferation via  
931 G0/G1 Cell Cycle Arrest. *Oncology Research*, 23(5), 237–48.  
932 <http://doi.org/10.3727/096504016X14562725373671>

933
